# Supplementary material for: Development of prognostic signatures for intermediate-risk papillary thyroid cancer
Source: PubMed Central journal article supplement (PMC5025616; doi:10.1186/s12885-016-2771-6), 2016-09-15
Supplement: 12885_2016_2771_MOESM1_ESM.pdf [file 12885_2016_2771_MOESM1_ESM.pdf]

**Supplementary table 1: Demographic factors in extreme good and an extreme poor prognosis patient groups (in samples for which data was available).**

| <b>Demographic factor</b>   | <b>Level</b>                                  | <b>Extreme Poor prognosis</b> | <b>Extreme good prognosis</b> |
|-----------------------------|-----------------------------------------------|-------------------------------|-------------------------------|
| <b>Total</b>                |                                               | 79                            | 51                            |
| <b>Race</b>                 | American Indian or Alaska Native              | 1                             |                               |
|                             | Asian                                         | 6                             |                               |
|                             | Black/African American                        | 8                             | 7                             |
|                             | White                                         | 57                            | 42                            |
| <b>Gender</b>               | Female                                        | 54                            | 42                            |
|                             | Male                                          | 25                            | 9                             |
| <b>Histological subtype</b> | Classical/usual                               | 65                            | 36                            |
|                             | Follicular ( $\geq$ 99% follicular patterned) | 10                            | 12                            |
|                             | Tall Cell ( $\geq$ 50% tall cell features)    | 3                             | 2                             |
| <b>Age</b>                  | Age (n <45 years)                             | 28                            | 32                            |

**Supplementary table 2: Genes deregulated in extremem poor prognosis PTC patients relative to extreme good prognosis patients**

| Gene Name | Fold Change | Q-value (%) | Normal vs. Tumor | Average Expression            |
|-----------|-------------|-------------|------------------|-------------------------------|
|           |             |             | P-value          | Difference Normal Minus Tumor |
| NR1D1     | 1.85        | 0.00        | <0.001           | -2.13                         |
| LIMS3     | 1.72        | 1.28        | <0.001           | -0.58                         |
| IQGAP3    | 1.72        | 1.28        | <0.001           | -2.49                         |
| SNX22     | 1.70        | 1.28        | <0.001           | -1.02                         |
| FSTL3     | 1.69        | 1.28        | <0.001           | -1.29                         |
| AREG      | 1.68        | 1.28        | 0.001            | -0.92                         |
| CELF4     | 1.67        | 1.28        | <0.001           | -2.8                          |
| C1orf51   | 1.64        | 2.22        | <0.001           | -0.88                         |
| EPHA10    | 1.63        | 2.22        | <0.001           | -3.68                         |
| FLJ23867  | 1.59        | 4.70        | <0.001           | -1.85                         |
| MGAT5B    | 0.79        | 4.70        | 0.145            | 0.29                          |
| ABCA8     | 0.79        | 4.70        | <0.001           | 1.73                          |
| NPR1      | 0.79        | 4.70        | <0.001           | 0.52                          |
| CECR2     | 0.79        | 4.70        | <0.001           | 3.29                          |
| CNTNAP2   | 0.79        | 4.70        | <0.001           | 1.74                          |
| FAM83B    | 0.79        | 4.70        | <0.001           | 1.09                          |
| FXD1      | 0.79        | 4.70        | <0.001           | 2.83                          |
| ROR2      | 0.79        | 4.70        | <0.001           | 2.47                          |
| TBXA2R    | 0.79        | 4.70        | <0.001           | -0.71                         |
| MRGPRF    | 0.79        | 4.70        | <0.001           | 1.32                          |
| SLC38A11  | 0.78        | 4.70        | <0.001           | -1.47                         |
| WDR72     | 0.78        | 4.70        | <0.001           | 2.56                          |
| CCDC151   | 0.78        | 4.70        | 0.001            | 0.55                          |
| ATP1A3    | 0.78        | 4.70        | 0.308            | 0.21                          |
| FOLR2     | 0.78        | 4.70        | <0.001           | -0.5                          |
| CTNND2    | 0.78        | 4.70        | <0.001           | 1.43                          |
| MGC42105  | 0.78        | 4.70        | <0.001           | 1.18                          |
| KIAA1324L | 0.78        | 4.70        | <0.001           | 0.98                          |
| NLGN3     | 0.78        | 4.70        | <0.001           | 1.44                          |
| GLT8D2    | 0.78        | 4.70        | <0.001           | 2.61                          |
| C1QTNF2   | 0.78        | 3.12        | <0.001           | 1.29                          |
| RUNDC2A   | 0.78        | 4.70        | <0.001           | 1.01                          |
| TXNDC3    | 0.78        | 4.70        | <0.001           | -0.83                         |
| POU2AF1   | 0.78        | 4.70        | 0.075            | 0.73                          |
| MGAM      | 0.78        | 4.70        | 0.008            | -0.3                          |
| OSR1      | 0.78        | 4.70        | <0.001           | 3.15                          |
| CD209     | 0.78        | 4.70        | 0.581            | -0.07                         |
| MAB21L1   | 0.78        | 3.12        | <0.001           | 1.55                          |
| LRP8      | 0.78        | 4.70        | <0.001           | 0.95                          |
| CES3      | 0.78        | 4.70        | 0.231            | -0.22                         |
| THSD7B    | 0.78        | 2.22        | 0.469            | 0.01                          |
| HGF       | 0.78        | 4.70        | <0.001           | 1.58                          |
| PTGDS     | 0.78        | 3.12        | <0.001           | 1.68                          |
| RGS18     | 0.78        | 4.70        | 0.818            | 0.08                          |
| COL6A6    | 0.78        | 4.70        | <0.001           | 1.62                          |
| CSMD2     | 0.78        | 4.70        | <0.001           | -0.83                         |
| PVRL3     | 0.78        | 4.70        | <0.001           | 0.97                          |
| C20orf151 | 0.78        | 4.70        | <0.001           | 0.62                          |
| PRPH2     | 0.78        | 4.70        | <0.001           | 1.37                          |
| CD4       | 0.78        | 4.70        | <0.001           | -0.59                         |
| SLC15A3   | 0.78        | 3.12        | 0.079            | -0.21                         |

|           |      |      |        |       |
|-----------|------|------|--------|-------|
| GRAMD2    | 0.78 | 4.70 | <0.001 | 2.11  |
| BVES      | 0.78 | 3.12 | <0.001 | 0.99  |
| KCNK3     | 0.78 | 4.70 | <0.001 | 0.51  |
| C18orf34  | 0.78 | 4.70 | <0.001 | 1.88  |
| TEKT3     | 0.78 | 4.70 | <0.001 | 1.69  |
| TTC16     | 0.78 | 4.70 | <0.001 | 1.1   |
| GPR65     | 0.78 | 4.70 | 0.962  | 0.08  |
| NQO1      | 0.78 | 4.70 | 0.806  | -0.14 |
| CNR1      | 0.78 | 4.70 | 0.009  | 0.5   |
| MDS2      | 0.78 | 3.12 | <0.001 | 1.31  |
| KIF21B    | 0.78 | 4.70 | 0.002  | 0.72  |
| CYTH4     | 0.78 | 4.70 | 0.202  | -0.17 |
| EDN3      | 0.78 | 3.12 | <0.001 | 3.4   |
| EPHB1     | 0.78 | 4.70 | <0.001 | 2.63  |
| PDE3B     | 0.77 | 4.70 | 0.001  | 0.65  |
| RGS5      | 0.77 | 3.12 | <0.001 | -0.7  |
| DCLK3     | 0.77 | 3.12 | <0.001 | -1.62 |
| FLRT2     | 0.77 | 3.12 | <0.001 | 1.61  |
| DUOX2     | 0.77 | 3.12 | 0.799  | 0.01  |
| LOC150197 | 0.77 | 4.70 | <0.001 | 0.8   |
| SIGLEC5   | 0.77 | 4.70 | 0.224  | -0.18 |
| TLL1      | 0.77 | 4.70 | <0.001 | 0.76  |
| AGAP2     | 0.77 | 3.12 | 0.792  | 0.14  |
| XIST      | 0.77 | 4.70 | 0.943  | 0.03  |
| LILRB1    | 0.77 | 4.70 | 0.003  | -0.64 |
| GDPD3     | 0.77 | 3.12 | 0.088  | 0.21  |
| FRMPD2    | 0.77 | 4.70 | <0.001 | -1.26 |
| SHBG      | 0.77 | 4.70 | <0.001 | 0.88  |
| SMTNL2    | 0.77 | 3.12 | 0.001  | -0.56 |
| MUSTN1    | 0.77 | 3.12 | <0.001 | 1.11  |
| ANKRD20A3 | 0.77 | 4.70 | <0.001 | 1.95  |
| FAM181B   | 0.77 | 4.70 | <0.001 | 2.13  |
| CDC14C    | 0.77 | 4.70 | <0.001 | 1.49  |
| CABP4     | 0.77 | 3.12 | 0.069  | -0.23 |
| EMR1      | 0.77 | 4.70 | <0.001 | -0.76 |
| OR2W3     | 0.77 | 3.12 | <0.001 | 1.57  |
| WNT11     | 0.77 | 3.12 | <0.001 | 3.04  |
| GPR18     | 0.77 | 4.70 | 0.01   | 0.9   |
| IL10RA    | 0.77 | 4.70 | 0.551  | -0.01 |
| GRAPL     | 0.77 | 3.12 | 0.001  | 0.52  |
| CFP       | 0.77 | 3.12 | 0.216  | -0.05 |
| DNAH9     | 0.77 | 3.12 | <0.001 | 1.33  |
| TPH1      | 0.77 | 4.70 | 0.266  | -0.25 |
| TMEM63C   | 0.77 | 4.70 | 0.144  | 0.14  |
| NHS       | 0.77 | 3.12 | <0.001 | 1.54  |
| SIGLEC1   | 0.77 | 3.12 | <0.001 | -0.6  |
| ST6GAL1   | 0.77 | 4.70 | <0.001 | 0.69  |
| CEL       | 0.77 | 4.70 | 0.203  | -0.14 |
| DENND2A   | 0.77 | 3.12 | <0.001 | 0.74  |
| CD180     | 0.77 | 3.12 | 0.215  | -0.14 |
| TLR10     | 0.77 | 3.12 | 0.761  | 0.16  |
| C1QTNF7   | 0.77 | 3.12 | <0.001 | 2.66  |
| FMOD      | 0.77 | 3.12 | <0.001 | 1.87  |
| FOXP2     | 0.77 | 3.12 | <0.001 | 3.29  |
| DBH       | 0.77 | 3.12 | <0.001 | 0.79  |

|           |      |      |        |       |
|-----------|------|------|--------|-------|
| SLC7A9    | 0.77 | 4.70 | <0.001 | 1.26  |
| EPHA3     | 0.77 | 3.12 | <0.001 | 2.44  |
| LOC387646 | 0.77 | 3.12 | <0.001 | 1.56  |
| EDARADD   | 0.77 | 3.12 | <0.001 | 1.71  |
| CT62      | 0.77 | 3.12 | 0.696  | 0.13  |
| ZNF98     | 0.77 | 3.12 | <0.001 | 0.9   |
| CEBPA     | 0.77 | 3.12 | 0.001  | 0.43  |
| ABCD2     | 0.77 | 3.12 | <0.001 | 1.02  |
| DES       | 0.77 | 4.70 | <0.001 | 3.67  |
| HCG2P7    | 0.77 | 4.70 | <0.001 | 0.84  |
| NCAM1     | 0.77 | 3.12 | <0.001 | 2.82  |
| JAKMIP3   | 0.77 | 3.12 | <0.001 | 1.71  |
| WFIKKN2   | 0.77 | 3.12 | 0.761  | 0.07  |
| SLAMF6    | 0.77 | 3.12 | <0.001 | 1.15  |
| PPARGC1A  | 0.76 | 3.12 | <0.001 | 2.81  |
| PHKG1     | 0.76 | 4.70 | <0.001 | 0.72  |
| SPIB      | 0.76 | 3.12 | 0.028  | 1.11  |
| GAPT      | 0.76 | 3.12 | 0.299  | -0.11 |
| CD8B      | 0.76 | 3.12 | 0.002  | 0.83  |
| GFI1      | 0.76 | 3.12 | <0.001 | 0.82  |
| PKDCC     | 0.76 | 2.22 | <0.001 | 1.53  |
| CD79B     | 0.76 | 3.12 | 0.01   | -0.18 |
| PDE10A    | 0.76 | 2.22 | <0.001 | 1.57  |
| ZNF488    | 0.76 | 3.12 | <0.001 | 0.84  |
| DNALI1    | 0.76 | 3.12 | <0.001 | 1.43  |
| SLC6A16   | 0.76 | 3.12 | <0.001 | 2.42  |
| SOSTDC1   | 0.76 | 3.12 | <0.001 | 3.12  |
| HRH2      | 0.76 | 3.12 | <0.001 | 1.12  |
| F13A1     | 0.76 | 3.12 | 0.965  | -0.01 |
| HIGD1B    | 0.76 | 3.12 | <0.001 | -2.32 |
| FERMT1    | 0.76 | 3.12 | <0.001 | 2.2   |
| FAM95B1   | 0.76 | 3.12 | <0.001 | 1.78  |
| CKMT2     | 0.76 | 3.12 | 0.489  | 0.09  |
| CYP46A1   | 0.76 | 3.12 | <0.001 | 1.02  |
| ROPN1B    | 0.76 | 3.12 | <0.001 | 2.19  |
| SYBU      | 0.76 | 2.22 | <0.001 | 0.98  |
| TRIM58    | 0.76 | 3.12 | <0.001 | 1.67  |
| VIP       | 0.76 | 3.12 | 0.333  | 0.15  |
| GATM      | 0.76 | 3.12 | <0.001 | 1.57  |
| RNF150    | 0.76 | 3.12 | <0.001 | 2.62  |
| MYOM3     | 0.76 | 3.12 | <0.001 | -2.1  |
| AOC2      | 0.76 | 3.12 | <0.001 | 0.58  |
| SLA       | 0.76 | 3.12 | <0.001 | 0.53  |
| LOC728606 | 0.76 | 3.12 | 0.583  | 0.43  |
| CRYBB1    | 0.76 | 2.22 | 0.001  | -0.58 |
| COL14A1   | 0.76 | 2.22 | 0.056  | 0.35  |
| GNAL      | 0.76 | 3.12 | <0.001 | 1.58  |
| CHST8     | 0.76 | 3.12 | <0.001 | 1.14  |
| ADIG      | 0.76 | 3.12 | <0.001 | 2.9   |
| MGC16703  | 0.76 | 3.12 | <0.001 | 0.61  |
| BCL2L15   | 0.76 | 3.12 | <0.001 | 0.67  |
| ST8SIA1   | 0.76 | 3.12 | <0.001 | 1.49  |
| HSD17B3   | 0.76 | 3.12 | <0.001 | 3     |
| C18orf16  | 0.76 | 3.12 | <0.001 | 0.79  |
| FBXO17    | 0.76 | 2.22 | <0.001 | 1.47  |

|           |      |      |        |       |
|-----------|------|------|--------|-------|
| LG14      | 0.76 | 2.22 | <0.001 | 1.11  |
| LOC402377 | 0.76 | 3.12 | <0.001 | 1.21  |
| C3orf36   | 0.76 | 3.12 | <0.001 | -0.79 |
| BEGAIN    | 0.76 | 2.22 | <0.001 | 0.56  |
| HECW2     | 0.76 | 2.22 | 0.047  | -0.2  |
| KLRD1     | 0.76 | 3.12 | <0.001 | 0.84  |
| C12orf69  | 0.76 | 3.12 | <0.001 | 2     |
| SLITRK5   | 0.76 | 3.12 | <0.001 | 3.92  |
| CHRNA6    | 0.76 | 3.12 | 0.002  | -0.6  |
| ABCC4     | 0.76 | 2.22 | <0.001 | 1.74  |
| MYO7A     | 0.76 | 2.22 | 0.014  | -0.32 |
| ISM1      | 0.76 | 3.12 | <0.001 | 1.67  |
| CEACAM21  | 0.76 | 3.12 | 0.253  | 0.29  |
| PGM5P2    | 0.76 | 2.22 | <0.001 | 1.05  |
| GPR174    | 0.76 | 3.12 | <0.001 | 1.44  |
| STX11     | 0.76 | 2.22 | <0.001 | 1.49  |
| FBXW10    | 0.76 | 3.12 | <0.001 | 2.69  |
| FAM81B    | 0.76 | 3.12 | <0.001 | 1.28  |
| TSPAN7    | 0.76 | 2.22 | <0.001 | 1.09  |
| SCML4     | 0.76 | 2.22 | <0.001 | 1.39  |
| JAKMIP1   | 0.76 | 2.22 | <0.001 | 1.74  |
| CPXM2     | 0.75 | 3.12 | <0.001 | 1.46  |
| HSPB6     | 0.75 | 2.22 | <0.001 | 2.08  |
| MYO1H     | 0.75 | 3.12 | <0.001 | 1.71  |
| NRG2      | 0.75 | 2.22 | <0.001 | 1.16  |
| TRPV6     | 0.75 | 3.12 | <0.001 | 1.23  |
| PSAT1     | 0.75 | 2.22 | <0.001 | 0.55  |
| BTBD11    | 0.75 | 3.12 | <0.001 | 1.67  |
| SGCD      | 0.75 | 2.22 | <0.001 | 2.36  |
| SCUBE2    | 0.75 | 2.22 | <0.001 | 0.9   |
| C20orf26  | 0.75 | 3.12 | <0.001 | 2.06  |
| MCART6    | 0.75 | 2.22 | <0.001 | 0.65  |
| RPS6KA6   | 0.75 | 2.22 | <0.001 | 2.25  |
| ANKRD20B  | 0.75 | 2.22 | <0.001 | 1.94  |
| QPRT      | 0.75 | 2.22 | 0.922  | -0.07 |
| FAM81A    | 0.75 | 2.22 | 0.03   | 0.28  |
| CD300C    | 0.75 | 3.12 | 0.277  | -0.06 |
| GNMT      | 0.75 | 2.22 | <0.001 | 1.25  |
| BATF2     | 0.75 | 2.22 | 0.059  | 0.2   |
| KIF1A     | 0.75 | 2.22 | <0.001 | 2.52  |
| TSNAXIP1  | 0.75 | 3.12 | <0.001 | 2.13  |
| LOC389493 | 0.75 | 3.12 | <0.001 | 1.19  |
| ZNF826    | 0.75 | 2.22 | <0.001 | 1.48  |
| IGF2BP3   | 0.75 | 2.22 | <0.001 | 0.94  |
| SUSD5     | 0.75 | 2.22 | <0.001 | 0.97  |
| SDF2L1    | 0.75 | 3.12 | <0.001 | 0.85  |
| SDPR      | 0.75 | 2.22 | <0.001 | 1.61  |
| ITPRIPL1  | 0.75 | 2.22 | 0.082  | -0.22 |
| SLC29A4   | 0.75 | 3.12 | <0.001 | 2.18  |
| CD96      | 0.75 | 2.22 | <0.001 | 0.97  |
| PCDHGA2   | 0.75 | 2.22 | 0.276  | 0.31  |
| C5orf20   | 0.75 | 2.22 | 0.329  | 0.32  |
| FCN3      | 0.75 | 2.22 | <0.001 | -1.52 |
| EFHB      | 0.75 | 2.22 | <0.001 | 2.14  |
| RGL4      | 0.75 | 2.22 | 0.049  | 0.4   |

|            |      |      |        |       |
|------------|------|------|--------|-------|
| CCDC141    | 0.75 | 2.22 | <0.001 | 1.6   |
| ART4       | 0.75 | 2.22 | <0.001 | 2.85  |
| CNTFR      | 0.75 | 2.22 | <0.001 | 3.19  |
| LOC728264  | 0.75 | 2.22 | <0.001 | -0.49 |
| ITGAL      | 0.75 | 2.22 | 0.006  | 0.64  |
| SGCA       | 0.75 | 2.22 | 0.066  | 0.38  |
| ISLR2      | 0.75 | 2.22 | 0.001  | -0.44 |
| LOC653786  | 0.75 | 2.22 | <0.001 | -0.99 |
| GRAMD1B    | 0.75 | 2.22 | <0.001 | 1.17  |
| HRC        | 0.75 | 1.28 | 0.464  | 0.02  |
| CCDC85A    | 0.75 | 2.22 | <0.001 | 1.61  |
| KLF2       | 0.75 | 2.22 | <0.001 | 0.66  |
| SIGLEC11   | 0.75 | 2.22 | <0.001 | 1.53  |
| COX7A1     | 0.75 | 1.28 | 0.068  | 0.43  |
| ATP6V1G2   | 0.75 | 2.22 | <0.001 | 1.02  |
| CX3CR1     | 0.75 | 2.22 | <0.001 | -0.54 |
| MYCBPAP    | 0.75 | 2.22 | <0.001 | 0.84  |
| UNC45B     | 0.75 | 2.22 | <0.001 | 0.59  |
| C9orf66    | 0.75 | 2.22 | <0.001 | 1.43  |
| SLC6A17    | 0.75 | 2.22 | <0.001 | 0.95  |
| C16orf89   | 0.75 | 2.22 | <0.001 | 1.21  |
| DERL3      | 0.75 | 2.22 | 0.838  | -0.11 |
| MYEOV      | 0.75 | 2.22 | 0.223  | 0.2   |
| CMKLR1     | 0.75 | 2.22 | <0.001 | 0.8   |
| PLXNB3     | 0.75 | 2.22 | 0.193  | -0.15 |
| TPTE2P1    | 0.75 | 2.22 | <0.001 | 3.36  |
| LQK1       | 0.75 | 2.22 | 0.529  | 0.15  |
| SLC17A7    | 0.75 | 1.28 | <0.001 | 2.42  |
| ABCA10     | 0.75 | 2.22 | <0.001 | 2.21  |
| DLX6       | 0.75 | 2.22 | 0.026  | -0.34 |
| GALNT14    | 0.74 | 2.22 | 0.02   | -0.36 |
| TLR7       | 0.74 | 2.22 | 0.062  | -0.33 |
| PURG       | 0.74 | 2.22 | <0.001 | 0.83  |
| RASGRP2    | 0.74 | 2.22 | 0.019  | 0.64  |
| PCBP3      | 0.74 | 2.22 | 0.077  | 0.35  |
| VNN2       | 0.74 | 2.22 | 0.204  | 0.46  |
| GGTLC1     | 0.74 | 2.22 | <0.001 | 0.62  |
| ANK2       | 0.74 | 2.22 | <0.001 | 3.06  |
| ITGA8      | 0.74 | 1.28 | <0.001 | 1.46  |
| NCRNA00173 | 0.74 | 2.22 | <0.001 | 1.07  |
| PPM1L      | 0.74 | 2.22 | <0.001 | 1.64  |
| ABCG4      | 0.74 | 2.22 | <0.001 | -1.36 |
| CD38       | 0.74 | 2.22 | <0.001 | 1.73  |
| C1QTNF9    | 0.74 | 2.22 | <0.001 | 1     |
| PRR15L     | 0.74 | 1.28 | <0.001 | 1.33  |
| TPPP       | 0.74 | 2.22 | <0.001 | 2.48  |
| CRABP1     | 0.74 | 2.22 | <0.001 | 3.92  |
| CD6        | 0.74 | 1.28 | 0.132  | 0.47  |
| PRR18      | 0.74 | 2.22 | <0.001 | 1.27  |
| CHRNA3     | 0.74 | 2.22 | 0.001  | 0.65  |
| TMC3       | 0.74 | 2.22 | 0.008  | -0.54 |
| ATP1B2     | 0.74 | 2.22 | 0.203  | 0.24  |
| OLFM2      | 0.74 | 2.22 | <0.001 | 1.4   |
| OXCT2      | 0.74 | 2.22 | <0.001 | 0.81  |
| TRIM50     | 0.74 | 2.22 | <0.001 | 1.93  |

|              |      |      |        |       |
|--------------|------|------|--------|-------|
| LMOD1        | 0.74 | 2.22 | <0.001 | 2.68  |
| TRPM6        | 0.74 | 2.22 | <0.001 | 1.16  |
| GOLGA9P      | 0.74 | 2.22 | <0.001 | 1.94  |
| BCL11B       | 0.74 | 1.28 | <0.001 | 1.71  |
| SLC24A3      | 0.74 | 2.22 | <0.001 | 2.02  |
| FABP5        | 0.74 | 2.22 | <0.001 | 0.68  |
| GLIPR1L2     | 0.74 | 2.22 | <0.001 | 1.13  |
| SFTPC        | 0.74 | 2.22 | <0.001 | 2.79  |
| TCEAL2       | 0.74 | 2.22 | <0.001 | 3.37  |
| MX2          | 0.74 | 2.22 | 0.221  | -0.14 |
| CCDC48       | 0.74 | 1.28 | 0.001  | 0.48  |
| DNAJC12      | 0.74 | 1.28 | 0.038  | 0.27  |
| PKNOX2       | 0.74 | 2.22 | <0.001 | 3.45  |
| GPR20        | 0.74 | 2.22 | 0.307  | 0.17  |
| PPP1R3C      | 0.74 | 2.22 | 0.836  | -0.03 |
| CYP7B1       | 0.74 | 1.28 | <0.001 | 1.84  |
| IL33         | 0.74 | 2.22 | <0.001 | 1.55  |
| EYA4         | 0.74 | 1.28 | <0.001 | 1.98  |
| PCDP1        | 0.74 | 2.22 | <0.001 | 2.2   |
| PIK3CG       | 0.74 | 2.22 | 0.137  | 0.42  |
| FAM181A      | 0.74 | 1.28 | <0.001 | 0.91  |
| NMUR2        | 0.74 | 1.28 | <0.001 | 1.61  |
| SLC4A5       | 0.74 | 1.28 | 0.005  | 0.42  |
| EDN2         | 0.74 | 2.22 | 0.084  | -0.33 |
| C13orf15     | 0.74 | 1.28 | 0.581  | 0.03  |
| TUBA3D       | 0.74 | 1.28 | <0.001 | 0.67  |
| PLA2G4F      | 0.74 | 1.28 | <0.001 | 2.03  |
| UGT8         | 0.74 | 1.28 | <0.001 | 2.03  |
| GPR141       | 0.74 | 1.28 | 0.008  | -0.59 |
| OSBPL6       | 0.74 | 1.28 | <0.001 | 1.46  |
| SLC15A2      | 0.74 | 1.28 | <0.001 | 0.77  |
| FLJ35024     | 0.74 | 2.22 | <0.001 | 2.06  |
| NKG7         | 0.74 | 1.28 | 0.13   | 0.34  |
| TSPAN18      | 0.74 | 1.28 | 0.283  | -0.2  |
| FLT1         | 0.74 | 1.28 | 0.028  | -0.22 |
| CORO2B       | 0.74 | 1.28 | <0.001 | 1.63  |
| PDCD1        | 0.73 | 1.28 | <0.001 | 1.02  |
| AOAH         | 0.73 | 1.28 | <0.001 | 0.89  |
| GPER         | 0.73 | 1.28 | <0.001 | 0.83  |
| PCSK1        | 0.73 | 1.28 | <0.001 | 1.06  |
| LHFPL1       | 0.73 | 2.22 | <0.001 | 0.94  |
| ENPP3        | 0.73 | 1.28 | 0.018  | 0.09  |
| HOXA3        | 0.73 | 1.28 | <0.001 | 0.61  |
| SCUBE1       | 0.73 | 2.22 | <0.001 | 0.59  |
| RNF157       | 0.73 | 1.28 | <0.001 | 0.97  |
| SLC16A8      | 0.73 | 1.28 | 0.001  | 0.35  |
| PROX1        | 0.73 | 1.28 | <0.001 | 2.89  |
| NEB          | 0.73 | 2.22 | <0.001 | 3.06  |
| FAM3D        | 0.73 | 1.28 | <0.001 | -0.7  |
| LRRC4C       | 0.73 | 0.91 | <0.001 | 2.37  |
| TNNI3K       | 0.73 | 1.28 | <0.001 | 0.95  |
| PCDHB15      | 0.73 | 1.28 | <0.001 | 0.62  |
| RASSF6       | 0.73 | 2.22 | <0.001 | 3.51  |
| LOC100129726 | 0.73 | 1.28 | <0.001 | 1.59  |
| CARD16       | 0.73 | 1.28 | 0.189  | -0.15 |

|           |      |      |        |       |
|-----------|------|------|--------|-------|
| PAH       | 0.73 | 1.28 | <0.001 | 1.39  |
| HKDC1     | 0.73 | 1.28 | <0.001 | 2.24  |
| KLRK1     | 0.73 | 1.28 | <0.001 | 1.31  |
| GPR83     | 0.73 | 1.28 | <0.001 | 2.33  |
| EDA       | 0.73 | 1.28 | 0.003  | 0.73  |
| FBXO15    | 0.73 | 2.22 | <0.001 | 1.93  |
| HAND2     | 0.73 | 1.28 | <0.001 | 2.06  |
| OTOS      | 0.73 | 2.22 | <0.001 | 2.53  |
| PRF1      | 0.73 | 1.28 | <0.001 | 0.63  |
| FAM129C   | 0.73 | 1.28 | 0.14   | 1.07  |
| LOC115110 | 0.73 | 1.28 | <0.001 | -0.4  |
| MPEG1     | 0.73 | 1.28 | 0.361  | 0.23  |
| EFCAB5    | 0.73 | 1.28 | <0.001 | 0.67  |
| BLK       | 0.73 | 1.28 | <0.001 | 2.34  |
| ACSL6     | 0.73 | 1.28 | <0.001 | 2.24  |
| C10orf128 | 0.73 | 2.22 | 0.301  | 0.21  |
| LOC342346 | 0.73 | 1.28 | <0.001 | 1.74  |
| DHH       | 0.73 | 2.22 | <0.001 | -0.49 |
| CYP26B1   | 0.73 | 1.28 | <0.001 | 1.63  |
| ADCY1     | 0.73 | 1.28 | <0.001 | 0.64  |
| EXOC3L    | 0.73 | 0.91 | <0.001 | -0.37 |
| CAPSL     | 0.73 | 1.28 | <0.001 | 2.55  |
| RFPL1S    | 0.73 | 1.28 | <0.001 | 1.29  |
| C1orf127  | 0.73 | 1.28 | 0.052  | 0.27  |
| CLMN      | 0.73 | 1.28 | <0.001 | 2.07  |
| INHBC     | 0.73 | 1.28 | <0.001 | 1.73  |
| TMEM90B   | 0.73 | 1.28 | <0.001 | 2.49  |
| RAPGEF4   | 0.73 | 0.91 | <0.001 | -0.45 |
| ZNF323    | 0.73 | 1.28 | <0.001 | 0.74  |
| WDR65     | 0.73 | 1.28 | <0.001 | 1.76  |
| BOC       | 0.73 | 0.91 | <0.001 | 0.53  |
| CDYL2     | 0.73 | 1.28 | 0.747  | 0.03  |
| BST2      | 0.73 | 1.28 | 0.346  | 0.14  |
| PLA2G3    | 0.73 | 1.28 | 0.001  | 0.76  |
| HS3ST3B1  | 0.73 | 1.28 | <0.001 | 0.89  |
| ROPN1L    | 0.73 | 1.28 | <0.001 | 1.21  |
| COL4A6    | 0.73 | 1.28 | <0.001 | 2.43  |
| SUCNR1    | 0.73 | 1.28 | <0.001 | 2.13  |
| FOXF2     | 0.73 | 0.91 | <0.001 | 1.04  |
| LOC283174 | 0.73 | 1.28 | <0.001 | 1.78  |
| DLX1      | 0.73 | 0.91 | <0.001 | 0.68  |
| C9orf152  | 0.73 | 0.91 | <0.001 | 1.34  |
| PRIMA1    | 0.73 | 1.28 | <0.001 | 2.94  |
| DDIT4L    | 0.73 | 1.28 | <0.001 | 1.62  |
| CD163L1   | 0.72 | 0.91 | <0.001 | 1.04  |
| C10orf79  | 0.72 | 1.28 | <0.001 | 1.96  |
| COL9A3    | 0.72 | 1.28 | <0.001 | 3.11  |
| PDE11A    | 0.72 | 1.28 | <0.001 | 2.63  |
| C9orf43   | 0.72 | 1.28 | <0.001 | 1.32  |
| SYT6      | 0.72 | 1.28 | 0.003  | -0.6  |
| LRRN2     | 0.72 | 1.28 | 0.008  | 0.4   |
| GP6       | 0.72 | 2.22 | <0.001 | 0.88  |
| DEPDC6    | 0.72 | 1.28 | <0.001 | 2.11  |
| UPF0639   | 0.72 | 1.28 | <0.001 | 3.43  |
| ADAM22    | 0.72 | 0.91 | <0.001 | 2.87  |



|            |      |      |        |       |
|------------|------|------|--------|-------|
| PDE7B      | 0.72 | 0.91 | 0.353  | 0.2   |
| SAMD3      | 0.72 | 1.28 | 0.021  | 0.56  |
| ZNF521     | 0.72 | 0.91 | <0.001 | 0.79  |
| FMO2       | 0.72 | 0.91 | <0.001 | 2.89  |
| TOX        | 0.72 | 1.28 | <0.001 | 1.97  |
| AKR1C1     | 0.72 | 1.28 | <0.001 | 2.73  |
| FAM166B    | 0.72 | 1.28 | 0.121  | 0.23  |
| TDH        | 0.72 | 1.28 | <0.001 | 2.56  |
| GZMK       | 0.72 | 1.28 | <0.001 | 1.42  |
| NOL4       | 0.72 | 1.28 | <0.001 | 4.25  |
| CDHR3      | 0.72 | 1.28 | <0.001 | 3.09  |
| SH2D6      | 0.72 | 1.28 | <0.001 | 3.53  |
| DOCK10     | 0.72 | 0.91 | <0.001 | -0.73 |
| SSPO       | 0.72 | 1.28 | <0.001 | 1.12  |
| CECR1      | 0.72 | 0.91 | 0.164  | 0.38  |
| VPREB3     | 0.72 | 1.28 | <0.001 | 1.38  |
| GCSH       | 0.72 | 1.28 | <0.001 | 1.53  |
| KCNIP3     | 0.72 | 1.28 | <0.001 | 1.35  |
| CCDC68     | 0.72 | 0.91 | <0.001 | 0.82  |
| GRRP1      | 0.72 | 0.91 | 0.258  | 0.13  |
| AKR1E2     | 0.72 | 1.28 | <0.001 | 2.38  |
| FGF12      | 0.72 | 1.28 | 0.001  | 0.35  |
| VAV3       | 0.72 | 0.91 | 0.45   | -0.15 |
| PRKCA      | 0.72 | 0.91 | <0.001 | 1.33  |
| PLVAP      | 0.72 | 0.91 | 0.002  | -0.38 |
| DUOXA2     | 0.72 | 0.91 | 0.12   | 0.22  |
| GPR62      | 0.72 | 0.91 | <0.001 | 0.96  |
| DACH2      | 0.72 | 1.28 | <0.001 | -1.92 |
| CD8A       | 0.72 | 1.28 | <0.001 | 1.2   |
| TXNDC6     | 0.72 | 1.28 | <0.001 | 0.47  |
| CACNA2D3   | 0.72 | 0.91 | <0.001 | 1.56  |
| C7orf58    | 0.72 | 0.91 | <0.001 | 1.3   |
| C12orf39   | 0.72 | 0.91 | <0.001 | 3.44  |
| EPB41L3    | 0.72 | 0.91 | <0.001 | 0.94  |
| FAM167A    | 0.72 | 1.28 | <0.001 | 2.73  |
| TMSB15A    | 0.72 | 1.28 | <0.001 | 0.67  |
| GPR34      | 0.72 | 0.91 | 0.3    | -0.11 |
| C11orf21   | 0.72 | 1.28 | 0.078  | 0.38  |
| COL25A1    | 0.72 | 0.91 | <0.001 | 2.07  |
| TCF7L1     | 0.72 | 0.91 | <0.001 | 1.67  |
| HOXA2      | 0.72 | 0.38 | <0.001 | 0.63  |
| AMDHD1     | 0.72 | 1.28 | <0.001 | 0.68  |
| RTN1       | 0.71 | 0.91 | <0.001 | 1.44  |
| SH2D1B     | 0.71 | 1.28 | 0.028  | 0.4   |
| SPARCL1    | 0.71 | 0.91 | 0.007  | 0.34  |
| KCNK2      | 0.71 | 1.28 | <0.001 | 3.14  |
| FABP4      | 0.71 | 0.91 | <0.001 | 3.26  |
| SSTR1      | 0.71 | 1.28 | 0.001  | 0.5   |
| AR         | 0.71 | 0.91 | <0.001 | 2.41  |
| TBX21      | 0.71 | 0.91 | <0.001 | 0.87  |
| KITLG      | 0.71 | 0.38 | 0.023  | 0.33  |
| LRRC55     | 0.71 | 0.91 | 0.361  | -0.1  |
| CACNA2D2   | 0.71 | 0.91 | 0.853  | 0.01  |
| TNFRSF11B  | 0.71 | 0.91 | <0.001 | 2.82  |
| ST6GALNAC1 | 0.71 | 1.28 | 0.644  | -0.03 |

|          |      |      |        |       |
|----------|------|------|--------|-------|
| SLC5A5   | 0.71 | 1.28 | <0.001 | 6.27  |
| C9orf122 | 0.71 | 0.91 | <0.001 | 1.17  |
| PLB1     | 0.71 | 0.91 | <0.001 | 1.16  |
| SERHL2   | 0.71 | 0.91 | <0.001 | 2.64  |
| MYH11    | 0.71 | 0.91 | <0.001 | 1.68  |
| TNFSF8   | 0.71 | 0.91 | 0.004  | 0.7   |
| RBP5     | 0.71 | 0.91 | <0.001 | 1.05  |
| RERG     | 0.71 | 0.38 | 0.059  | 0.28  |
| FAM19A1  | 0.71 | 1.28 | <0.001 | 1.04  |
| SCG3     | 0.71 | 1.28 | <0.001 | 2.6   |
| WDR63    | 0.71 | 0.91 | <0.001 | 0.63  |
| PREX2    | 0.71 | 0.91 | <0.001 | 2.13  |
| ADH1B    | 0.71 | 0.91 | <0.001 | 5.17  |
| TSPAN33  | 0.71 | 0.91 | <0.001 | 1.04  |
| DIO2     | 0.71 | 0.38 | <0.001 | 2.04  |
| MT1M     | 0.71 | 0.91 | <0.001 | 2.39  |
| FAM162B  | 0.71 | 0.38 | 0.002  | 0.59  |
| FGL2     | 0.71 | 0.91 | <0.001 | 1.79  |
| HS6ST3   | 0.71 | 0.91 | <0.001 | 3.15  |
| MAOB     | 0.71 | 0.91 | <0.001 | 1.6   |
| SCN4B    | 0.71 | 0.38 | <0.001 | 0.95  |
| RBM20    | 0.71 | 0.91 | <0.001 | 1.18  |
| C14orf50 | 0.71 | 0.91 | <0.001 | 1.01  |
| ASXL3    | 0.71 | 0.91 | <0.001 | 3.79  |
| KCNK17   | 0.71 | 0.38 | 0.001  | 0.72  |
| SELP     | 0.71 | 0.91 | 0.001  | -0.43 |
| SLC25A34 | 0.71 | 0.91 | <0.001 | 0.67  |
| ART5     | 0.71 | 0.91 | <0.001 | 2.63  |
| C16orf74 | 0.71 | 0.91 | <0.001 | 0.56  |
| ABCG2    | 0.71 | 1.28 | <0.001 | -0.49 |
| CPNE5    | 0.71 | 0.91 | <0.001 | -0.67 |
| FAM155B  | 0.71 | 0.91 | <0.001 | 1.32  |
| GPC3     | 0.71 | 0.91 | <0.001 | 4.46  |
| C8orf84  | 0.71 | 0.91 | <0.001 | 2.44  |
| FAM26F   | 0.71 | 0.91 | 0.61   | -0.08 |
| BMX      | 0.71 | 0.91 | <0.001 | 0.54  |
| QRICH2   | 0.71 | 0.91 | <0.001 | 1.32  |
| TPO      | 0.70 | 0.91 | <0.001 | 4.42  |
| ANKRD29  | 0.70 | 0.38 | <0.001 | 1.53  |
| MEOX2    | 0.70 | 0.38 | <0.001 | 1.65  |
| KCNC1    | 0.70 | 0.91 | <0.001 | 0.68  |
| F10      | 0.70 | 0.91 | <0.001 | 3.06  |
| GFRA1    | 0.70 | 0.91 | <0.001 | 3.55  |
| AGMAT    | 0.70 | 0.38 | <0.001 | 0.49  |
| P2RY8    | 0.70 | 0.38 | 0.432  | 0.16  |
| COL9A1   | 0.70 | 0.91 | 0.307  | -0.19 |
| PACSIN1  | 0.70 | 0.91 | <0.001 | -0.78 |
| AKR1C2   | 0.70 | 0.91 | <0.001 | 2.92  |
| JPH4     | 0.70 | 0.91 | 0.14   | -0.12 |
| DHDPSL   | 0.70 | 0.38 | <0.001 | 2.25  |
| GPX3     | 0.70 | 0.91 | <0.001 | 0.97  |
| FOXJ1    | 0.70 | 0.91 | <0.001 | 3.81  |
| AQP4     | 0.70 | 0.38 | <0.001 | 2.18  |
| MYCN     | 0.70 | 0.38 | <0.001 | 1.41  |
| TDO2     | 0.70 | 0.91 | <0.001 | -1.57 |

|              |      |      |        |       |
|--------------|------|------|--------|-------|
| DPY19L2P4    | 0.70 | 0.91 | <0.001 | 2.16  |
| BMP8A        | 0.70 | 0.91 | <0.001 | 4.14  |
| CD27         | 0.70 | 0.38 | 0.007  | 0.62  |
| NPL          | 0.70 | 0.91 | 0.609  | 0.01  |
| ATP2C2       | 0.70 | 0.38 | <0.001 | 3.74  |
| AVPR2        | 0.70 | 0.91 | 0.063  | 0.29  |
| TMEM47       | 0.70 | 0.38 | <0.001 | 1.08  |
| PYGM         | 0.70 | 0.91 | <0.001 | 2.15  |
| COCH         | 0.70 | 0.38 | <0.001 | 0.88  |
| WFDC1        | 0.70 | 0.38 | 0.019  | 0.32  |
| AVPR1A       | 0.70 | 0.38 | <0.001 | 3.29  |
| LOC151174    | 0.70 | 0.91 | 0.004  | -0.42 |
| PTPRQ        | 0.70 | 0.38 | <0.001 | 3.87  |
| DOC2A        | 0.70 | 0.38 | 0.112  | -0.22 |
| MAPK4        | 0.70 | 0.91 | <0.001 | 4.31  |
| SMAD5OS      | 0.70 | 0.38 | <0.001 | 0.95  |
| MT1H         | 0.70 | 0.91 | <0.001 | 4.06  |
| LOC84856     | 0.70 | 0.38 | <0.001 | 0.96  |
| C3orf55      | 0.70 | 0.38 | <0.001 | 2.2   |
| CLEC3B       | 0.70 | 0.38 | 0.177  | 0.19  |
| DLEU7        | 0.70 | 0.38 | <0.001 | 0.76  |
| EXOC3L2      | 0.70 | 0.38 | 0.001  | -0.43 |
| PLCH1        | 0.70 | 0.38 | <0.001 | 3.05  |
| MMRN1        | 0.69 | 0.91 | <0.001 | 3.88  |
| FAM13C       | 0.69 | 0.38 | <0.001 | 1.15  |
| FGD2         | 0.69 | 0.91 | <0.001 | 1.4   |
| RANBP3L      | 0.69 | 0.38 | <0.001 | 2.79  |
| EMID1        | 0.69 | 0.38 | <0.001 | 0.94  |
| LRRC70       | 0.69 | 0.38 | 0.001  | 0.42  |
| FLT4         | 0.69 | 0.25 | 0.003  | 0.4   |
| PID1         | 0.69 | 0.38 | <0.001 | 3.06  |
| ELMO1        | 0.69 | 0.38 | <0.001 | 2.39  |
| LRMP         | 0.69 | 0.38 | 0.209  | 0.43  |
| ANO3         | 0.69 | 0.38 | <0.001 | 0.97  |
| C6orf165     | 0.69 | 0.38 | <0.001 | 1.68  |
| LRRC2        | 0.69 | 0.38 | <0.001 | 1.45  |
| ATRNL1       | 0.69 | 0.38 | <0.001 | 1.22  |
| GPR37L1      | 0.69 | 0.91 | <0.001 | 1.98  |
| ABCC8        | 0.69 | 0.38 | <0.001 | 2.37  |
| FGFBP2       | 0.69 | 0.38 | <0.001 | 1.22  |
| DPT          | 0.69 | 0.38 | <0.001 | 5.53  |
| FREM2        | 0.69 | 0.38 | <0.001 | 1.48  |
| SUSD2        | 0.69 | 0.38 | <0.001 | -0.42 |
| FRZB         | 0.69 | 0.00 | 0.344  | 0.19  |
| CASP12       | 0.69 | 0.38 | <0.001 | 1.03  |
| GZMM         | 0.69 | 0.38 | <0.001 | 0.94  |
| KIT          | 0.69 | 0.38 | <0.001 | 3.22  |
| LOC100128164 | 0.69 | 0.38 | <0.001 | 1.35  |
| PDE1B        | 0.69 | 0.38 | 0.339  | -0.09 |
| EFHC2        | 0.69 | 0.38 | <0.001 | 1.7   |
| SLC16A2      | 0.69 | 0.38 | <0.001 | 1.62  |
| LOC400759    | 0.69 | 0.25 | <0.001 | 1.02  |
| SHANK2       | 0.69 | 0.25 | <0.001 | 1.95  |
| ZNF541       | 0.69 | 0.91 | <0.001 | 1.31  |
| GRB14        | 0.69 | 0.38 | <0.001 | 1.09  |

|           |      |      |        |       |
|-----------|------|------|--------|-------|
| CACNB2    | 0.69 | 0.25 | 0.484  | -0.02 |
| NCF1B     | 0.69 | 0.38 | 0.11   | 0.48  |
| XK        | 0.69 | 0.38 | <0.001 | 0.82  |
| INPP5J    | 0.69 | 0.38 | <0.001 | 0.73  |
| IPCEF1    | 0.69 | 0.38 | <0.001 | 4.09  |
| KATNAL2   | 0.69 | 0.38 | <0.001 | 1.82  |
| SLC1A2    | 0.69 | 0.38 | <0.001 | 1.65  |
| LOC400043 | 0.69 | 0.25 | 0.033  | 0.27  |
| STXBP5L   | 0.69 | 0.38 | <0.001 | 4.37  |
| USHBP1    | 0.69 | 0.38 | 0.028  | -0.23 |
| EFEMP1    | 0.69 | 0.38 | <0.001 | 2.26  |
| COLEC10   | 0.69 | 0.38 | <0.001 | 2.54  |
| RIMKLA    | 0.69 | 0.25 | <0.001 | 1.81  |
| MYH3      | 0.69 | 0.25 | <0.001 | 1.32  |
| SELV      | 0.69 | 0.38 | <0.001 | 3.45  |
| MS4A1     | 0.69 | 0.38 | 0.017  | 1.3   |
| TRPV4     | 0.69 | 0.25 | 0.014  | -0.22 |
| RGNEF     | 0.69 | 0.38 | <0.001 | 1.79  |
| MASP1     | 0.69 | 0.38 | <0.001 | 3.61  |
| EBF4      | 0.69 | 0.25 | <0.001 | 1.64  |
| SLC13A4   | 0.69 | 0.38 | <0.001 | 1.12  |
| SULT1C4   | 0.69 | 0.25 | <0.001 | 1.58  |
| SLC5A4    | 0.68 | 0.38 | 0.997  | 0.01  |
| ARHGEF37  | 0.68 | 0.25 | <0.001 | 1.15  |
| PRKG1     | 0.68 | 0.25 | <0.001 | 2     |
| LILRB5    | 0.68 | 0.25 | 0.421  | 0.11  |
| DPY19L2   | 0.68 | 0.38 | <0.001 | 1.76  |
| EOMES     | 0.68 | 0.38 | <0.001 | 1.02  |
| LOC201651 | 0.68 | 0.25 | <0.001 | 3.95  |
| ME1       | 0.68 | 0.38 | <0.001 | 1     |
| RGS9      | 0.68 | 0.25 | <0.001 | 1.37  |
| RADIL     | 0.68 | 0.25 | <0.001 | 3.05  |
| KCNA3     | 0.68 | 0.25 | <0.001 | 1.05  |
| LIPG      | 0.68 | 0.25 | <0.001 | 1.23  |
| SLC26A7   | 0.68 | 0.25 | <0.001 | 3.43  |
| CDCA7     | 0.68 | 0.38 | <0.001 | -0.68 |
| C15orf51  | 0.68 | 0.38 | <0.001 | 1.25  |
| FHL5      | 0.68 | 0.25 | 0.003  | 0.58  |
| C13orf36  | 0.68 | 0.25 | <0.001 | 4.04  |
| C19orf35  | 0.68 | 0.38 | 0.337  | -0.15 |
| SP6       | 0.68 | 0.25 | 0.465  | 0.1   |
| MT1L      | 0.68 | 0.38 | <0.001 | 1.11  |
| ASCL2     | 0.68 | 0.38 | <0.001 | 0.81  |
| CWH43     | 0.68 | 0.25 | <0.001 | 4.35  |
| LGI3      | 0.68 | 0.25 | <0.001 | 2.18  |
| ARHGAP28  | 0.68 | 0.25 | <0.001 | 1.28  |
| SCN3B     | 0.68 | 0.25 | <0.001 | 1.41  |
| REM1      | 0.68 | 0.00 | 0.295  | -0.11 |
| TMEM88    | 0.68 | 0.25 | 0.705  | 0.09  |
| MT1F      | 0.68 | 0.38 | <0.001 | 2.68  |
| GPR98     | 0.68 | 0.25 | <0.001 | 3.62  |
| ROBO4     | 0.68 | 0.25 | 0.085  | -0.18 |
| MOSC1     | 0.68 | 0.25 | <0.001 | 1.09  |
| CXCL12    | 0.67 | 0.00 | <0.001 | 1.43  |
| PRKCB     | 0.67 | 0.00 | 0.568  | 0.01  |

|              |      |      |        |       |
|--------------|------|------|--------|-------|
| CETP         | 0.67 | 0.25 | 0.007  | 0.62  |
| LOC100272216 | 0.67 | 0.00 | <0.001 | 1.65  |
| CD36         | 0.67 | 0.25 | <0.001 | 1.53  |
| SYN3         | 0.67 | 0.25 | <0.001 | 0.62  |
| LAMC3        | 0.67 | 0.25 | <0.001 | 0.96  |
| APBA2        | 0.67 | 0.25 | <0.001 | 1.09  |
| TAL1         | 0.67 | 0.00 | <0.001 | 0.72  |
| MAB21L2      | 0.67 | 0.25 | <0.001 | 1.45  |
| SLCO1C1      | 0.67 | 0.25 | <0.001 | -0.94 |
| PFKFB1       | 0.67 | 0.38 | <0.001 | 2.22  |
| PLA1A        | 0.67 | 0.25 | <0.001 | 0.82  |
| LOC442421    | 0.67 | 0.25 | <0.001 | 1.31  |
| LRRTM1       | 0.67 | 0.25 | <0.001 | 1.6   |
| MYOM1        | 0.67 | 0.00 | <0.001 | 0.92  |
| MATN2        | 0.67 | 0.25 | <0.001 | 2.79  |
| ANKK1        | 0.67 | 0.00 | <0.001 | 2.22  |
| MLC1         | 0.67 | 0.25 | 0.411  | 0.14  |
| C9orf24      | 0.67 | 0.25 | <0.001 | 2.11  |
| CA4          | 0.67 | 0.00 | <0.001 | 3.01  |
| KHDRBS2      | 0.67 | 0.25 | <0.001 | 3.28  |
| CR2          | 0.67 | 0.25 | <0.001 | 2.1   |
| CLEC9A       | 0.67 | 0.25 | 0.341  | 0.3   |
| RTN4RL1      | 0.67 | 0.25 | 0.373  | 0.22  |
| CCL14        | 0.67 | 0.00 | <0.001 | 1.33  |
| QRFPR        | 0.67 | 0.00 | <0.001 | -1.56 |
| LOC100134868 | 0.67 | 0.25 | <0.001 | 1.5   |
| ARHGAP24     | 0.67 | 0.25 | <0.001 | 2.27  |
| TRPC6        | 0.67 | 0.00 | <0.001 | 0.87  |
| RGS7BP       | 0.67 | 0.25 | <0.001 | 1.37  |
| PAPSS2       | 0.66 | 0.38 | <0.001 | 2.94  |
| IGDCC4       | 0.66 | 0.00 | 0.14   | 0.13  |
| IP6K3        | 0.66 | 0.25 | <0.001 | 2.69  |
| CDHR1        | 0.66 | 0.25 | <0.001 | 1.25  |
| LRP1B        | 0.66 | 0.25 | <0.001 | 5.87  |
| FRMPD1       | 0.66 | 0.00 | <0.001 | 1.94  |
| CDON         | 0.66 | 0.25 | <0.001 | 2.14  |
| OCA2         | 0.66 | 0.25 | <0.001 | 4.38  |
| TMEM38A      | 0.66 | 0.25 | <0.001 | 0.85  |
| MYCL1        | 0.66 | 0.00 | <0.001 | 1.07  |
| ANK1         | 0.66 | 0.25 | <0.001 | 0.77  |
| RSPH4A       | 0.66 | 0.00 | <0.001 | 1.63  |
| LRP2         | 0.66 | 0.00 | <0.001 | 2.17  |
| CUX2         | 0.66 | 0.00 | <0.001 | 5.2   |
| KCNJ10       | 0.66 | 0.00 | 0.002  | 0.53  |
| TMEM171      | 0.66 | 0.25 | <0.001 | 2.77  |
| SLC14A2      | 0.66 | 0.25 | <0.001 | 1.24  |
| SLC26A4      | 0.66 | 0.00 | <0.001 | 3.24  |
| HAP1         | 0.66 | 0.25 | <0.001 | 2.99  |
| DIRAS2       | 0.66 | 0.00 | <0.001 | 2.98  |
| ITPR1        | 0.66 | 0.00 | <0.001 | 2.59  |
| B3GALT2      | 0.66 | 0.00 | <0.001 | 3.23  |
| PTCH2        | 0.66 | 0.00 | <0.001 | 1.68  |
| GPR17        | 0.66 | 0.25 | <0.001 | 0.72  |
| C2orf73      | 0.66 | 0.25 | <0.001 | 1.85  |
| RASSF9       | 0.66 | 0.00 | <0.001 | 3     |

|           |      |      |        |       |
|-----------|------|------|--------|-------|
| CABP1     | 0.66 | 0.00 | <0.001 | -0.57 |
| DPP6      | 0.66 | 0.00 | <0.001 | 5.5   |
| GP5       | 0.66 | 0.00 | <0.001 | 2.07  |
| SORCS1    | 0.66 | 0.00 | <0.001 | 1.48  |
| ANGPT1    | 0.66 | 0.00 | 0.006  | 0.41  |
| NFASC     | 0.66 | 0.00 | <0.001 | 0.91  |
| CACNB4    | 0.66 | 0.00 | <0.001 | 1.28  |
| KDR       | 0.66 | 0.00 | 0.501  | -0.03 |
| ADRB1     | 0.66 | 0.00 | 0.007  | 0.32  |
| CNTN5     | 0.66 | 0.00 | <0.001 | 4.56  |
| FMO1      | 0.65 | 0.00 | <0.001 | 2.34  |
| C14orf64  | 0.65 | 0.00 | <0.001 | 1.99  |
| MIOX      | 0.65 | 0.25 | <0.001 | 2.69  |
| SEMA3D    | 0.65 | 0.00 | <0.001 | 5.08  |
| PTGDR     | 0.65 | 0.00 | <0.001 | 1.04  |
| ADCY5     | 0.65 | 0.00 | <0.001 | 1.06  |
| CXXC4     | 0.65 | 0.00 | <0.001 | 1.82  |
| L3MBTL4   | 0.65 | 0.00 | <0.001 | 1.64  |
| NMUR1     | 0.65 | 0.00 | <0.001 | 1.1   |
| BCO2      | 0.65 | 0.00 | <0.001 | 1.77  |
| ZNF366    | 0.65 | 0.00 | 0.913  | 0.1   |
| SCN3A     | 0.65 | 0.00 | <0.001 | 2.51  |
| RYR2      | 0.65 | 0.00 | <0.001 | 4.57  |
| PI16      | 0.65 | 0.00 | <0.001 | 4.22  |
| PRTG      | 0.65 | 0.00 | <0.001 | 1.86  |
| FHL1      | 0.65 | 0.00 | <0.001 | 2.42  |
| LOC286002 | 0.65 | 0.00 | <0.001 | 3.1   |
| FAM189A1  | 0.65 | 0.00 | <0.001 | 2.96  |
| SDK2      | 0.65 | 0.00 | <0.001 | 2.03  |
| RXFP1     | 0.65 | 0.00 | <0.001 | 2.56  |
| SGK1      | 0.65 | 0.00 | <0.001 | 0.98  |
| IL22RA1   | 0.65 | 0.00 | <0.001 | 0.69  |
| DIO1      | 0.65 | 0.00 | <0.001 | 4.33  |
| ZMAT4     | 0.65 | 0.00 | <0.001 | 4.98  |
| CETN4P    | 0.65 | 0.00 | <0.001 | 0.95  |
| ANGPTL1   | 0.65 | 0.00 | <0.001 | 2.32  |
| LOC90246  | 0.65 | 0.00 | 0.083  | 0.23  |
| AKAP3     | 0.64 | 0.00 | <0.001 | 1.52  |
| RELN      | 0.64 | 0.00 | <0.001 | 5.54  |
| ST3GAL6   | 0.64 | 0.00 | 0.461  | -0.06 |
| AOX1      | 0.64 | 0.00 | <0.001 | 4.48  |
| AGTR1     | 0.64 | 0.00 | <0.001 | 2.41  |
| TFCP2L1   | 0.64 | 0.00 | <0.001 | 3.84  |
| USP44     | 0.64 | 0.00 | <0.001 | 1.41  |
| HGD       | 0.64 | 0.00 | <0.001 | 3.25  |
| SLC4A4    | 0.64 | 0.00 | <0.001 | 3.45  |
| KCNAB1    | 0.64 | 0.00 | <0.001 | 1.85  |
| LIFR      | 0.64 | 0.00 | <0.001 | 2.46  |
| FAM163A   | 0.64 | 0.00 | <0.001 | 3.64  |
| FAM124A   | 0.64 | 0.00 | <0.001 | 2.17  |
| IGFBPL1   | 0.64 | 0.00 | <0.001 | 4.16  |
| ACE       | 0.64 | 0.00 | 0.001  | 0.38  |
| AXIN2     | 0.64 | 0.00 | <0.001 | 1.26  |
| EMCN      | 0.64 | 0.00 | <0.001 | 0.59  |
| CNTN2     | 0.64 | 0.00 | <0.001 | 1.01  |

|              |      |      |        |       |
|--------------|------|------|--------|-------|
| ANO2         | 0.63 | 0.00 | 0.564  | 0.05  |
| MT1G         | 0.63 | 0.00 | <0.001 | 3.83  |
| DNASE1L3     | 0.63 | 0.00 | <0.001 | 1.18  |
| GBP4         | 0.63 | 0.00 | 0.153  | 0.14  |
| IRS1         | 0.63 | 0.00 | <0.001 | 1.71  |
| MYRIP        | 0.63 | 0.00 | <0.001 | 0.64  |
| RAG1         | 0.63 | 0.00 | <0.001 | 2.19  |
| ESRRG        | 0.63 | 0.00 | <0.001 | 1.7   |
| NWD1         | 0.63 | 0.00 | <0.001 | 3.94  |
| ALDH1A1      | 0.63 | 0.00 | <0.001 | 1.68  |
| PKHD1L1      | 0.63 | 0.00 | <0.001 | 5.54  |
| GLDC         | 0.63 | 0.00 | <0.001 | 3.97  |
| GDF10        | 0.63 | 0.00 | <0.001 | 4.27  |
| CLEC4E       | 0.63 | 0.00 | <0.001 | 1.36  |
| SLC5A8       | 0.63 | 0.00 | <0.001 | 4.61  |
| REEP1        | 0.63 | 0.00 | <0.001 | 0.94  |
| COLEC11      | 0.62 | 0.00 | <0.001 | 1.16  |
| SIDT1        | 0.62 | 0.00 | 0.214  | 0.32  |
| PAMR1        | 0.62 | 0.00 | <0.001 | 0.69  |
| GPR126       | 0.62 | 0.00 | 0.333  | 0.14  |
| DLG2         | 0.62 | 0.00 | <0.001 | 3.54  |
| ECEL1        | 0.62 | 0.00 | 0.045  | -0.49 |
| FCGBP        | 0.62 | 0.00 | <0.001 | 1.9   |
| VWF          | 0.62 | 0.00 | 0.001  | -0.43 |
| GPM6A        | 0.62 | 0.00 | <0.001 | 3.52  |
| RCAN2        | 0.62 | 0.00 | <0.001 | 1.05  |
| KIAA1324     | 0.62 | 0.00 | <0.001 | 3.54  |
| GRIK4        | 0.62 | 0.00 | <0.001 | 3.05  |
| SHISA2       | 0.62 | 0.00 | 0.17   | 0.25  |
| KCNJ13       | 0.62 | 0.00 | <0.001 | 2.83  |
| CLCNKA       | 0.62 | 0.00 | <0.001 | 2.89  |
| SAMD5        | 0.62 | 0.00 | <0.001 | 2.1   |
| RUNX1T1      | 0.62 | 0.00 | <0.001 | 1.97  |
| TM4SF18      | 0.62 | 0.00 | 0.435  | -0.06 |
| SORBS2       | 0.62 | 0.00 | <0.001 | 2.28  |
| SYNE1        | 0.62 | 0.00 | <0.001 | 2.07  |
| C3orf32      | 0.62 | 0.00 | 0.001  | 0.7   |
| FZD9         | 0.62 | 0.00 | <0.001 | 1.12  |
| VIPR1        | 0.62 | 0.00 | <0.001 | 1.28  |
| SLC14A1      | 0.62 | 0.00 | <0.001 | 1.18  |
| CCL21        | 0.61 | 0.00 | <0.001 | 6.4   |
| LRRC4        | 0.61 | 0.00 | <0.001 | -1.4  |
| NOSTRIN      | 0.61 | 0.00 | 0.31   | -0.12 |
| SYNM         | 0.61 | 0.00 | <0.001 | 1.2   |
| RASL11A      | 0.61 | 0.00 | <0.001 | 0.89  |
| C1QTNF9B     | 0.61 | 0.00 | 0.625  | -0.04 |
| NOX5         | 0.61 | 0.00 | 0.005  | -0.91 |
| PCSK6        | 0.61 | 0.00 | <0.001 | 2.25  |
| GVIN1        | 0.61 | 0.00 | <0.001 | 1.31  |
| GNA14        | 0.61 | 0.00 | <0.001 | 1.91  |
| PEAR1        | 0.61 | 0.00 | <0.001 | 0.87  |
| DUSP26       | 0.61 | 0.00 | <0.001 | 0.98  |
| LOC100130238 | 0.61 | 0.00 | <0.001 | 3.41  |
| CDH16        | 0.61 | 0.00 | <0.001 | 5.47  |
| GRIN2C       | 0.61 | 0.00 | <0.001 | 3.52  |

|           |      |      |        |       |
|-----------|------|------|--------|-------|
| EBF3      | 0.60 | 0.00 | <0.001 | 0.7   |
| KY        | 0.60 | 0.00 | <0.001 | 2.37  |
| MPPED2    | 0.60 | 0.00 | <0.001 | 3.55  |
| C8orf80   | 0.60 | 0.00 | <0.001 | 3.74  |
| RERGL     | 0.60 | 0.00 | <0.001 | 3.09  |
| FAM124B   | 0.60 | 0.00 | <0.001 | -0.76 |
| PLA2R1    | 0.60 | 0.00 | <0.001 | 3.56  |
| SPINK5    | 0.60 | 0.00 | <0.001 | 1.32  |
| GABRB3    | 0.60 | 0.00 | <0.001 | 2.34  |
| FLRT1     | 0.59 | 0.00 | <0.001 | 3.24  |
| GCK       | 0.59 | 0.00 | <0.001 | 1.72  |
| SLC10A4   | 0.59 | 0.00 | 0.002  | -0.55 |
| CLCNKB    | 0.59 | 0.00 | <0.001 | 2.86  |
| CGNL1     | 0.59 | 0.00 | <0.001 | 1.29  |
| SYNGR1    | 0.59 | 0.00 | <0.001 | 1.07  |
| IQGAP2    | 0.59 | 0.00 | <0.001 | 1.95  |
| GRIP2     | 0.59 | 0.00 | 0.017  | 0.46  |
| MAP2K6    | 0.59 | 0.00 | <0.001 | 0.94  |
| CD300LG   | 0.59 | 0.00 | <0.001 | 2.19  |
| LOC145820 | 0.58 | 0.00 | <0.001 | 1.05  |
| IGDCC3    | 0.58 | 0.00 | 0.005  | 0.77  |
| TFF3      | 0.58 | 0.00 | <0.001 | 6.06  |
| MRO       | 0.58 | 0.00 | <0.001 | 4.32  |
| AQP7      | 0.58 | 0.00 | <0.001 | 1.06  |
| SOD3      | 0.57 | 0.00 | <0.001 | 2.3   |
| PGM5      | 0.57 | 0.00 | <0.001 | 1.65  |
| LRRC4B    | 0.56 | 0.00 | 0.218  | -0.17 |
| KIF19     | 0.56 | 0.00 | <0.001 | 3.57  |
| LTF       | 0.56 | 0.00 | <0.001 | 3.02  |
| FAM65C    | 0.56 | 0.00 | <0.001 | 1.65  |
| TDGF1     | 0.55 | 0.00 | <0.001 | 2.71  |
| WSCD2     | 0.55 | 0.00 | <0.001 | 5.3   |
| ABCB1     | 0.55 | 0.00 | 0.136  | 0.25  |
| PTPRR     | 0.54 | 0.00 | <0.001 | -0.8  |
| SYT15     | 0.48 | 0.00 | <0.001 | 0.77  |



**Supplementary table 3: Differential expression of prognostic genes in normal tissue, extreme good prognosis cancers and extreme poor prognosis cancers**

| Gene    | Mean expression normal adjacent tissue | Mean expression extreme good prognosis (cancer) | Mean expression extreme poor prognosis (cancer) | Correlation coefficient* (direction of differential expression from normal to good prognosis to poor prognosis) | P-value** (Differential expression between cancer and normal) | Q-value (FDR) (Differential expression between cancer and normal) | Direction (In extreme prognosis relative to good prognosis ) |
|---------|----------------------------------------|-------------------------------------------------|-------------------------------------------------|-----------------------------------------------------------------------------------------------------------------|---------------------------------------------------------------|-------------------------------------------------------------------|--------------------------------------------------------------|
| AREG    | 3.75                                   | 3.57                                            | 5.12                                            | 0.3                                                                                                             | <0.001                                                        | <0.001                                                            | Upregulated                                                  |
| NR1D1   | 7.92                                   | 9.34                                            | 10.43                                           | 0.68                                                                                                            | <0.001                                                        | <0.001                                                            | Upregulated                                                  |
| FSTL3   | 8.45                                   | 9.24                                            | 10.13                                           | 0.61                                                                                                            | <0.001                                                        | <0.001                                                            | Upregulated                                                  |
| IQGAP3  | 2.93                                   | 4.81                                            | 5.88                                            | 0.68                                                                                                            | <0.001                                                        | <0.001                                                            | Upregulated                                                  |
| HSN2    | 2.67                                   | 2.17                                            | 2.88                                            | 0.1                                                                                                             | 0.595326475                                                   | 0.595326475                                                       | Upregulated                                                  |
| SNX22   | 11.03                                  | 11.48                                           | 12.39                                           | 0.51                                                                                                            | <0.001                                                        | <0.001                                                            | Upregulated                                                  |
| LIMS3   | 3.5                                    | 3.13                                            | 4.5                                             | 0.29                                                                                                            | <0.001                                                        | <0.001                                                            | Upregulated                                                  |
| CELF4   | 3.19                                   | 5.32                                            | 6.51                                            | 0.74                                                                                                            | <0.001                                                        | <0.001                                                            | Upregulated                                                  |
| SYT15   | 6.55                                   | 6.41                                            | 5.28                                            | -0.53                                                                                                           | <0.001                                                        | <0.001                                                            | Downregulated                                                |
| LRRC4B  | 4.57                                   | 5.33                                            | 4.31                                            | -0.15                                                                                                           | 0.217677594                                                   | 0.219693128                                                       | Downregulated                                                |
| LRRC4   | 3.93                                   | 5.87                                            | 4.97                                            | 0.32                                                                                                            | <0.001                                                        | <0.001                                                            | Downregulated                                                |
| FZD9    | 2.7                                    | 2.13                                            | 0.97                                            | -0.52                                                                                                           | <0.001                                                        | <0.001                                                            | Downregulated                                                |
| SOD3    | 11.79                                  | 10.41                                           | 9.02                                            | -0.71                                                                                                           | <0.001                                                        | <0.001                                                            | Downregulated                                                |
| ABCB1   | 6.78                                   | 7.08                                            | 6.08                                            | -0.31                                                                                                           | 0.136357968                                                   | 0.140217155                                                       | Downregulated                                                |
| FAM65C  | 6.24                                   | 5.43                                            | 4.06                                            | -0.6                                                                                                            | <0.001                                                        | <0.001                                                            | Downregulated                                                |
| LTF     | 9.41                                   | 7.53                                            | 5.77                                            | -0.7                                                                                                            | <0.001                                                        | <0.001                                                            | Downregulated                                                |
| WSCD2   | 10.95                                  | 7.69                                            | 4.72                                            | -0.73                                                                                                           | <0.001                                                        | <0.001                                                            | Downregulated                                                |
| TDGF1   | 4.76                                   | 3.07                                            | 1.48                                            | -0.73                                                                                                           | <0.001                                                        | <0.001                                                            | Downregulated                                                |
| MRO     | 8.75                                   | 5.78                                            | 3.63                                            | -0.73                                                                                                           | <0.001                                                        | <0.001                                                            | Downregulated                                                |
| PGM5    | 8.44                                   | 7.38                                            | 6.38                                            | -0.68                                                                                                           | <0.001                                                        | <0.001                                                            | Downregulated                                                |
| RASL11A | 6.74                                   | 6.5                                             | 5.63                                            | -0.49                                                                                                           | <0.001                                                        | <0.001                                                            | Downregulated                                                |
| SPINK5  | 5.1                                    | 4.88                                            | 3.19                                            | -0.39                                                                                                           | <0.001                                                        | <0.001                                                            | Downregulated                                                |
| TFF3    | 14.03                                  | 9.64                                            | 7.12                                            | -0.76                                                                                                           | <0.001                                                        | <0.001                                                            | Downregulated                                                |
| SYNM    | 9.4                                    | 8.64                                            | 7.86                                            | -0.67                                                                                                           | <0.001                                                        | <0.001                                                            | Downregulated                                                |
| PAMR1   | 6.93                                   | 6.79                                            | 5.97                                            | -0.45                                                                                                           | <0.001                                                        | <0.001                                                            | Downregulated                                                |
| IGDCC3  | 5.38                                   | 5.7                                             | 4.05                                            | -0.33                                                                                                           | 0.004768615                                                   | 0.005046398                                                       | Downregulated                                                |
| GRIP2   | 2.5                                    | 2.82                                            | 1.66                                            | -0.3                                                                                                            | 0.016992077                                                   | 0.017809003                                                       | Downregulated                                                |
| PEAR1   | 8.09                                   | 7.72                                            | 6.93                                            | -0.55                                                                                                           | <0.001                                                        | <0.001                                                            | Downregulated                                                |

|          |       |       |       |       |             |             |               |
|----------|-------|-------|-------|-------|-------------|-------------|---------------|
| RERGL    | 5.72  | 3.78  | 2.18  | -0.66 | <0.001      | <0.001      | Downregulated |
| GABRB3   | 9.04  | 7.62  | 5.91  | -0.57 | <0.001      | <0.001      | Downregulated |
| GRIK4    | 7.04  | 5.15  | 3.47  | -0.65 | <0.001      | <0.001      | Downregulated |
| CGNL1    | 11.88 | 11.05 | 10.09 | -0.59 | <0.001      | <0.001      | Downregulated |
| FLRT1    | 7.93  | 5.84  | 4.06  | -0.66 | <0.001      | <0.001      | Downregulated |
| MPPED2   | 10.25 | 7.74  | 6.03  | -0.72 | <0.001      | <0.001      | Downregulated |
| KIF19    | 7     | 4.66  | 2.71  | -0.71 | <0.001      | <0.001      | Downregulated |
| GNA14    | 9.18  | 7.93  | 6.81  | -0.66 | <0.001      | <0.001      | Downregulated |
| IQGAP2   | 11.02 | 9.73  | 8.51  | -0.65 | <0.001      | <0.001      | Downregulated |
| GCK      | 4.07  | 3.27  | 1.8   | -0.56 | <0.001      | <0.001      | Downregulated |
| MAP2K6   | 5.77  | 5.35  | 4.53  | -0.52 | <0.001      | <0.001      | Downregulated |
| PCSK6    | 6.28  | 4.81  | 3.82  | -0.71 | <0.001      | <0.001      | Downregulated |
| REEP1    | 5.99  | 5.71  | 4.71  | -0.45 | <0.001      | <0.001      | Downregulated |
| GRIN2C   | 10.25 | 8.07  | 6.16  | -0.65 | <0.001      | <0.001      | Downregulated |
| FAM124B  | 4.12  | 5.43  | 4.67  | 0.19  | <0.001      | <0.001      | Downregulated |
| NOX5     | 2.64  | 4.56  | 2.76  | -0.01 | 0.004717782 | 0.005041551 | Downregulated |
| SDK2     | 7.86  | 6.63  | 5.54  | -0.64 | <0.001      | <0.001      | Downregulated |
| CD300LG  | 4.74  | 3.65  | 2.17  | -0.56 | <0.001      | <0.001      | Downregulated |
| SORBS2   | 13.23 | 11.49 | 10.57 | -0.73 | <0.001      | <0.001      | Downregulated |
| SYNGR1   | 8.91  | 8.38  | 7.57  | -0.57 | <0.001      | <0.001      | Downregulated |
| RCAN2    | 9.52  | 8.96  | 8.14  | -0.58 | <0.001      | <0.001      | Downregulated |
| ACE      | 9.64  | 9.63  | 8.94  | -0.36 | <0.001      | 0.001016059 | Downregulated |
| RUNX1T1  | 5.96  | 4.66  | 3.58  | -0.64 | <0.001      | <0.001      | Downregulated |
| SYNE1    | 12.55 | 11    | 10.19 | -0.73 | <0.001      | <0.001      | Downregulated |
| DLG2     | 9.93  | 7.28  | 6.06  | -0.76 | <0.001      | <0.001      | Downregulated |
| CDH16    | 11.18 | 7.25  | 4.97  | -0.73 | <0.001      | <0.001      | Downregulated |
| PLA2R1   | 11.47 | 8.69  | 7.54  | -0.79 | <0.001      | <0.001      | Downregulated |
| ECEL1    | 3.83  | 5.36  | 4.07  | 0.03  | 0.044716212 | 0.046419687 | Downregulated |
| AXIN2    | 9.39  | 8.57  | 7.89  | -0.64 | <0.001      | <0.001      | Downregulated |
| C8orf80  | 7.33  | 4.9   | 3.13  | -0.69 | <0.001      | <0.001      | Downregulated |
| VWF      | 11.55 | 12.44 | 11.7  | 0.03  | <0.001      | <0.001      | Downregulated |
| IRS1     | 11.84 | 10.54 | 9.82  | -0.69 | <0.001      | <0.001      | Downregulated |
| KIAA1324 | 9.79  | 7.41  | 5.8   | -0.67 | <0.001      | <0.001      | Downregulated |
| RELN     | 8.06  | 4.04  | 2.33  | -0.75 | <0.001      | <0.001      | Downregulated |
| CCL21    | 11.81 | 7.61  | 4.76  | -0.71 | <0.001      | <0.001      | Downregulated |

|            |       |      |      |       |        |        |               |
|------------|-------|------|------|-------|--------|--------|---------------|
| C14orf64   | 5.99  | 4.58 | 3.68 | -0.65 | <0.001 | <0.001 | Downregulated |
| PI16       | 9.1   | 6.3  | 4.54 | -0.67 | <0.001 | <0.001 | Downregulated |
| CXCL12     | 11    | 10.3 | 9.45 | -0.54 | <0.001 | <0.001 | Downregulated |
| CNTN2      | 2.5   | 2.3  | 1.19 | -0.41 | <0.001 | <0.001 | Downregulated |
| FAM124A    | 6.2   | 4.68 | 3.77 | -0.69 | <0.001 | <0.001 | Downregulated |
| NWD1       | 7.44  | 4.58 | 2.86 | -0.7  | <0.001 | <0.001 | Downregulated |
| C13orf36   | 7.7   | 4.96 | 3.16 | -0.66 | <0.001 | <0.001 | Downregulated |
| ZMAT4      | 8.87  | 5.37 | 3.13 | -0.67 | <0.001 | <0.001 | Downregulated |
| HGD        | 10.33 | 7.94 | 6.46 | -0.67 | <0.001 | <0.001 | Downregulated |
| SLC5A8     | 10.48 | 7.18 | 4.98 | -0.66 | <0.001 | <0.001 | Downregulated |
| RYR2       | 9.87  | 6.25 | 4.87 | -0.77 | <0.001 | <0.001 | Downregulated |
| LAMC3      | 5.23  | 5.05 | 3.8  | -0.35 | <0.001 | <0.001 | Downregulated |
| OC10027221 | 4.66  | 3.66 | 2.8  | -0.54 | <0.001 | <0.001 | Downregulated |
| DUSP26     | 3.67  | 3.39 | 2.25 | -0.4  | <0.001 | <0.001 | Downregulated |
| LOC442421  | 4.39  | 3.54 | 2.83 | -0.57 | <0.001 | <0.001 | Downregulated |
| FAM163A    | 5.69  | 3.1  | 1.72 | -0.7  | <0.001 | <0.001 | Downregulated |
| SAMD5      | 7.39  | 6.01 | 4.89 | -0.62 | <0.001 | <0.001 | Downregulated |
| RAG1       | 6.93  | 5.37 | 4.33 | -0.66 | <0.001 | <0.001 | Downregulated |
| MYCL1      | 7.86  | 7.28 | 6.58 | -0.5  | <0.001 | <0.001 | Downregulated |
| PRTG       | 9.98  | 8.63 | 7.95 | -0.67 | <0.001 | <0.001 | Downregulated |
| PKHD1L1    | 12.35 | 8.38 | 5.98 | -0.67 | <0.001 | <0.001 | Downregulated |
| TFCP2L1    | 11.98 | 8.96 | 7.67 | -0.74 | <0.001 | <0.001 | Downregulated |
| LIFR       | 11.57 | 9.71 | 8.85 | -0.71 | <0.001 | <0.001 | Downregulated |
| DPP6       | 10.52 | 6.82 | 4.66 | -0.69 | <0.001 | <0.001 | Downregulated |
| GPM6A      | 9.1   | 6.37 | 5.16 | -0.73 | <0.001 | <0.001 | Downregulated |
| SLC4A4     | 11.34 | 8.68 | 7.32 | -0.7  | <0.001 | <0.001 | Downregulated |
| DIO1       | 12.17 | 9.32 | 7.12 | -0.59 | <0.001 | <0.001 | Downregulated |
| IGFBPL1    | 7.48  | 4.17 | 2.78 | -0.75 | <0.001 | <0.001 | Downregulated |
| ADCY5      | 3.8   | 3.49 | 2.41 | -0.42 | <0.001 | <0.001 | Downregulated |
| GVIN1      | 6.9   | 6.14 | 5.29 | -0.49 | <0.001 | <0.001 | Downregulated |
| SLC14A2    | 4.21  | 4.11 | 2.44 | -0.31 | <0.001 | <0.001 | Downregulated |
| HAP1       | 7.26  | 4.96 | 3.9  | -0.72 | <0.001 | <0.001 | Downregulated |
| CWH43      | 9.07  | 5.91 | 4.21 | -0.68 | <0.001 | <0.001 | Downregulated |
| RASSF9     | 6.74  | 4.3  | 3.48 | -0.78 | <0.001 | <0.001 | Downregulated |
| ARHGEF37   | 7.33  | 6.58 | 5.89 | -0.58 | <0.001 | <0.001 | Downregulated |

|            |       |       |      |       |             |             |               |
|------------|-------|-------|------|-------|-------------|-------------|---------------|
| SIDT1      | 5     | 5.19  | 4.38 | -0.21 | 0.213856028 | 0.217853337 | Downregulated |
| APBA2      | 7.23  | 6.74  | 5.85 | -0.48 | <0.001      | <0.001      | Downregulated |
| OC10013486 | 3.04  | 1.97  | 1.22 | -0.58 | <0.001      | <0.001      | Downregulated |
| SEMA3D     | 10.97 | 7.23  | 5.15 | -0.69 | <0.001      | <0.001      | Downregulated |
| ZNF366     | 5.08  | 5.45  | 4.61 | -0.19 | 0.912813957 | 0.912813957 | Downregulated |
| CACNB4     | 6.48  | 5.78  | 4.84 | -0.5  | <0.001      | <0.001      | Downregulated |
| GDF10      | 7.7   | 4.87  | 3.01 | -0.69 | <0.001      | <0.001      | Downregulated |
| GP5        | 4.15  | 2.75  | 1.89 | -0.64 | <0.001      | <0.001      | Downregulated |
| ATP2C2     | 9.29  | 6.39  | 5.23 | -0.74 | <0.001      | <0.001      | Downregulated |
| AOX1       | 9.2   | 5.9   | 4.23 | -0.72 | <0.001      | <0.001      | Downregulated |
| PRKG1      | 7.21  | 5.75  | 4.74 | -0.6  | <0.001      | <0.001      | Downregulated |
| CXXC4      | 4.44  | 3.19  | 2.29 | -0.57 | <0.001      | <0.001      | Downregulated |
| RGS7BP     | 2.72  | 2.03  | 1.15 | -0.45 | <0.001      | <0.001      | Downregulated |
| LOC84856   | 2.38  | 1.96  | 1.19 | -0.42 | <0.001      | <0.001      | Downregulated |
| CUX2       | 7.91  | 4.04  | 2.09 | -0.66 | <0.001      | <0.001      | Downregulated |
| ITPR1      | 12.18 | 10.21 | 9.33 | -0.71 | <0.001      | <0.001      | Downregulated |
| GFRA1      | 7.9   | 5.3   | 3.97 | -0.67 | <0.001      | <0.001      | Downregulated |
| KIT        | 11.35 | 8.81  | 7.77 | -0.71 | <0.001      | <0.001      | Downregulated |
| EFEMP1     | 12.28 | 10.52 | 9.73 | -0.69 | <0.001      | <0.001      | Downregulated |

correlation coefficient

gene expression between cancer and normal adjacent tissue overall







|            |   |   |   |   |   |   |   |   |
|------------|---|---|---|---|---|---|---|---|
| FAM163A    | 1 | 1 | 1 | 1 | 1 | 1 | 1 | 7 |
| SAMD5      | 1 | 1 | 1 | 1 | 1 | 1 | 1 | 7 |
| RAG1       | 1 | 1 | 1 | 1 | 1 | 1 | 1 | 7 |
| MYCL1      | 1 | 1 | 1 | 1 | 1 | 1 | 1 | 7 |
| PRTG       | 1 | 1 | 1 | 1 | 1 | 1 | 1 | 7 |
| PKHD1L1    | 1 | 1 | 1 | 1 | 1 | 1 | 1 | 7 |
| TFCP2L1    | 1 | 1 | 1 | 1 | 1 | 1 | 1 | 7 |
| LIFR       | 1 | 1 | 1 | 1 | 1 | 1 | 1 | 7 |
| DPP6       | 1 | 1 | 1 | 1 | 1 | 1 | 1 | 7 |
| GPM6A      | 1 | 1 | 1 | 1 | 1 | 1 | 1 | 7 |
| SLC4A4     | 1 | 1 | 1 | 1 | 1 | 1 | 1 | 7 |
| DIO1       | 1 | 1 | 1 | 1 | 1 | 1 | 1 | 7 |
| IGFBPL1    | 1 | 1 | 1 | 1 | 1 | 1 | 1 | 7 |
| ADCY5      | 1 | 1 | 1 | 1 | 1 | 1 | 1 | 7 |
| GVIN1      | 1 | 1 | 1 | 1 | 1 | 1 | 1 | 7 |
| SLC14A2    | 1 | 1 | 1 | 1 | 1 | 1 | 1 | 7 |
| HAP1       | 1 | 1 | 1 | 1 | 1 | 1 | 1 | 7 |
| CWH43      | 1 | 1 | 1 | 1 | 1 | 1 | 1 | 7 |
| RASSF9     | 1 | 1 | 1 | 1 | 1 | 1 | 1 | 7 |
| ARHGEF37   | 1 | 1 | 1 | 1 | 1 | 1 | 1 | 7 |
| SIDT1      | 1 | 1 | 1 | 1 | 1 | 1 | 1 | 7 |
| APBA2      | 1 | 1 | 1 | 1 | 1 | 1 | 1 | 7 |
| LOC1001348 | 1 | 1 | 1 | 1 | 1 | 1 | 1 | 7 |
| SEMA3D     | 1 | 1 | 1 | 1 | 1 | 1 | 1 | 7 |
| ZNF366     | 1 | 1 | 1 | 1 | 1 | 1 | 1 | 7 |
| CACNB4     | 1 | 1 | 1 | 1 | 1 | 1 | 1 | 7 |
| GDF10      | 1 | 1 | 1 | 1 | 1 | 1 | 1 | 7 |
| GP5        | 1 | 1 | 1 | 1 | 1 | 1 | 1 | 7 |
| ATP2C2     | 1 | 1 | 1 | 1 | 1 | 1 | 1 | 7 |
| AOX1       | 1 | 1 | 1 | 1 | 1 | 1 | 1 | 7 |



|           |   |   |   |   |   |   |   |   |
|-----------|---|---|---|---|---|---|---|---|
| PRKG1     | 1 | 1 | 1 | 1 | 1 | 1 | 1 | 7 |
| CXXC4     | 1 | 1 | 1 | 1 | 1 | 1 | 1 | 7 |
| RGS7BP    | 1 | 1 | 1 | 1 | 1 | 1 | 1 | 7 |
| LOC84856  | 1 | 1 | 1 | 1 | 1 | 1 | 1 | 7 |
| CUX2      | 1 | 1 | 1 | 1 | 1 | 1 | 1 | 7 |
| ITPR1     | 1 | 1 | 1 | 1 | 1 | 1 | 1 | 7 |
| GFRA1     | 1 | 1 | 1 | 1 | 1 | 1 | 1 | 7 |
| KIT       | 1 | 1 | 1 | 1 | 1 | 1 | 1 | 7 |
| EFEMP1    | 1 | 1 | 1 | 1 | 1 | 1 | 1 | 7 |
| AQP7      | 1 | 1 | 1 | 0 | 1 | 1 | 1 | 6 |
| EBF3      | 1 | 1 | 1 | 0 | 1 | 1 | 1 | 6 |
| SLC10A4   | 1 | 1 | 1 | 0 | 1 | 1 | 1 | 6 |
| C1QTNF9B  | 1 | 1 | 1 | 0 | 1 | 1 | 1 | 6 |
| COLEC11   | 1 | 1 | 1 | 0 | 1 | 1 | 1 | 6 |
| TM4SF18   | 1 | 1 | 1 | 0 | 1 | 1 | 1 | 6 |
| LOC145820 | 1 | 1 | 1 | 0 | 1 | 1 | 1 | 6 |
| VIPR1     | 1 | 1 | 1 | 0 | 1 | 1 | 1 | 6 |
| SLC14A1   | 1 | 1 | 1 | 0 | 1 | 1 | 1 | 6 |
| QRFPR     | 1 | 1 | 1 | 0 | 1 | 1 | 1 | 6 |
| NOSTRIN   | 1 | 1 | 1 | 0 | 1 | 1 | 1 | 6 |
| CLCNKB    | 1 | 1 | 1 | 0 | 1 | 1 | 1 | 6 |
| ALDH1A1   | 1 | 1 | 1 | 0 | 1 | 1 | 1 | 6 |
| DNASE1L3  | 1 | 1 | 1 | 0 | 1 | 1 | 1 | 6 |
| EMCN      | 1 | 1 | 1 | 0 | 1 | 1 | 1 | 6 |
| KY        | 1 | 1 | 1 | 0 | 1 | 1 | 1 | 6 |
| PTPRR     | 1 | 1 | 1 | 0 | 1 | 1 | 1 | 6 |
| KCNJ13    | 1 | 1 | 1 | 0 | 1 | 1 | 1 | 6 |
| CETP      | 1 | 1 | 1 | 0 | 1 | 1 | 1 | 6 |
| AGTR1     | 1 | 1 | 1 | 0 | 1 | 1 | 1 | 6 |
| C3orf32   | 1 | 1 | 1 | 0 | 1 | 1 | 1 | 6 |

|            |   |   |   |   |   |   |   |   |
|------------|---|---|---|---|---|---|---|---|
| TMEM88     | 1 | 1 | 1 | 0 | 1 | 1 | 1 | 6 |
| CLCNKA     | 1 | 1 | 1 | 0 | 1 | 1 | 1 | 6 |
| ANO2       | 1 | 1 | 1 | 0 | 1 | 1 | 1 | 6 |
| CLEC3B     | 1 | 1 | 1 | 0 | 1 | 1 | 1 | 6 |
| CA4        | 1 | 1 | 1 | 0 | 1 | 1 | 1 | 6 |
| ROBO4      | 1 | 1 | 1 | 0 | 1 | 1 | 1 | 6 |
| EXOC3L2    | 1 | 1 | 1 | 0 | 1 | 1 | 1 | 6 |
| SHISA2     | 1 | 1 | 1 | 0 | 1 | 1 | 1 | 6 |
| REM1       | 1 | 1 | 1 | 0 | 1 | 1 | 1 | 6 |
| KDR        | 1 | 1 | 1 | 0 | 1 | 1 | 1 | 6 |
| KCNAB1     | 1 | 1 | 1 | 0 | 1 | 1 | 1 | 6 |
| LOC1001302 | 1 | 1 | 1 | 0 | 1 | 1 | 1 | 6 |
| LOC90246   | 1 | 1 | 1 | 0 | 1 | 1 | 1 | 6 |
| ST3GAL6    | 1 | 1 | 1 | 0 | 1 | 1 | 1 | 6 |
| TRPC6      | 1 | 1 | 1 | 0 | 1 | 1 | 1 | 6 |
| RTN4RL1    | 1 | 1 | 1 | 0 | 1 | 1 | 1 | 6 |
| FLT4       | 1 | 1 | 1 | 0 | 1 | 1 | 1 | 6 |
| CCL14      | 1 | 1 | 1 | 0 | 1 | 1 | 1 | 6 |
| FHL1       | 1 | 1 | 1 | 0 | 1 | 1 | 1 | 6 |
| FAM162B    | 1 | 1 | 1 | 0 | 1 | 1 | 1 | 6 |
| FCGBP      | 1 | 1 | 1 | 0 | 1 | 1 | 1 | 6 |
| TAL1       | 1 | 1 | 1 | 0 | 1 | 1 | 1 | 6 |
| ADRB1      | 1 | 1 | 1 | 0 | 1 | 1 | 1 | 6 |
| USHBP1     | 1 | 1 | 1 | 0 | 1 | 1 | 1 | 6 |
| CETN4P     | 1 | 1 | 1 | 0 | 1 | 1 | 1 | 6 |
| PDE1B      | 1 | 1 | 1 | 0 | 1 | 1 | 1 | 6 |
| ANGPTL1    | 1 | 1 | 1 | 0 | 1 | 1 | 1 | 6 |
| NMUR1      | 1 | 1 | 1 | 0 | 1 | 1 | 1 | 6 |
| MYRIP      | 1 | 1 | 1 | 0 | 1 | 1 | 1 | 6 |
| ANGPT1     | 1 | 1 | 1 | 0 | 1 | 1 | 1 | 6 |

|           |   |   |   |   |   |   |   |   |
|-----------|---|---|---|---|---|---|---|---|
| DIRAS2    | 1 | 1 | 1 | 0 | 1 | 1 | 1 | 6 |
| LRRTM1    | 1 | 1 | 1 | 0 | 1 | 1 | 1 | 6 |
| SCN4B     | 1 | 1 | 1 | 0 | 1 | 1 | 1 | 6 |
| FRZB      | 1 | 1 | 1 | 0 | 1 | 1 | 1 | 6 |
| GPR126    | 1 | 1 | 1 | 0 | 1 | 1 | 1 | 6 |
| SLCO1C1   | 1 | 1 | 1 | 0 | 1 | 1 | 1 | 6 |
| ESRRG     | 1 | 1 | 1 | 0 | 1 | 1 | 1 | 6 |
| MOSC1     | 1 | 1 | 1 | 0 | 1 | 1 | 1 | 6 |
| MAB21L2   | 1 | 1 | 1 | 0 | 1 | 1 | 1 | 6 |
| PLVAP     | 1 | 1 | 1 | 0 | 1 | 1 | 1 | 6 |
| GLDC      | 1 | 1 | 1 | 0 | 1 | 1 | 1 | 6 |
| NFASC     | 1 | 1 | 1 | 0 | 1 | 1 | 1 | 6 |
| IGDCC4    | 1 | 1 | 1 | 0 | 1 | 1 | 1 | 6 |
| SUSD2     | 1 | 1 | 1 | 0 | 1 | 1 | 1 | 6 |
| MT1G      | 1 | 1 | 1 | 0 | 1 | 1 | 1 | 6 |
| FRMPD1    | 1 | 1 | 1 | 0 | 1 | 1 | 1 | 6 |
| LRRC70    | 1 | 1 | 1 | 0 | 1 | 1 | 1 | 6 |
| BCO2      | 1 | 1 | 1 | 0 | 1 | 1 | 1 | 6 |
| FAM189A1  | 1 | 1 | 1 | 0 | 1 | 1 | 1 | 6 |
| CLEC4E    | 1 | 1 | 1 | 0 | 1 | 1 | 1 | 6 |
| SCN3A     | 1 | 1 | 1 | 0 | 1 | 1 | 1 | 6 |
| SP6       | 1 | 1 | 1 | 0 | 1 | 1 | 1 | 6 |
| FMO1      | 1 | 1 | 1 | 0 | 1 | 1 | 1 | 6 |
| KCNK17    | 1 | 1 | 1 | 0 | 1 | 1 | 1 | 6 |
| LOC286002 | 1 | 1 | 1 | 0 | 1 | 1 | 1 | 6 |
| TMEM47    | 1 | 1 | 1 | 0 | 1 | 1 | 1 | 6 |
| CASP12    | 1 | 1 | 1 | 0 | 1 | 1 | 1 | 6 |
| OCA2      | 1 | 1 | 1 | 0 | 1 | 1 | 1 | 6 |
| CABP1     | 1 | 1 | 1 | 0 | 1 | 1 | 1 | 6 |
| MT1L      | 1 | 1 | 1 | 0 | 1 | 1 | 1 | 6 |

|         |   |   |   |   |   |   |   |   |
|---------|---|---|---|---|---|---|---|---|
| ANO3    | 1 | 1 | 1 | 0 | 1 | 1 | 1 | 6 |
| SGK1    | 1 | 1 | 1 | 0 | 1 | 1 | 1 | 6 |
| KITLG   | 1 | 1 | 1 | 0 | 1 | 1 | 1 | 6 |
| RSPH4A  | 1 | 1 | 1 | 0 | 1 | 1 | 1 | 6 |
| USP44   | 1 | 1 | 1 | 0 | 1 | 1 | 1 | 6 |
| LIPG    | 1 | 1 | 1 | 0 | 1 | 1 | 1 | 6 |
| AKAP3   | 1 | 1 | 1 | 0 | 1 | 1 | 1 | 6 |
| SLC13A4 | 1 | 1 | 1 | 0 | 1 | 1 | 1 | 6 |
| CNTN5   | 1 | 1 | 1 | 0 | 1 | 1 | 1 | 6 |
| PDE7B   | 1 | 1 | 1 | 0 | 1 | 1 | 1 | 6 |
| C9orf24 | 1 | 1 | 1 | 0 | 1 | 1 | 1 | 6 |
| ANKK1   | 1 | 1 | 1 | 0 | 1 | 1 | 1 | 6 |
| SULT1C4 | 1 | 1 | 1 | 0 | 1 | 1 | 1 | 6 |
| PTGDR   | 1 | 1 | 1 | 0 | 1 | 1 | 1 | 6 |
| EBF4    | 1 | 1 | 1 | 0 | 1 | 1 | 1 | 6 |
| SELV    | 1 | 1 | 1 | 0 | 1 | 1 | 1 | 6 |
| RERG    | 1 | 1 | 1 | 0 | 1 | 1 | 1 | 6 |
| CDON    | 1 | 1 | 1 | 0 | 1 | 1 | 1 | 6 |
| PLCH1   | 1 | 1 | 1 | 0 | 1 | 1 | 1 | 6 |
| DIO2    | 1 | 1 | 1 | 0 | 1 | 1 | 1 | 6 |
| P2RY8   | 1 | 1 | 1 | 0 | 1 | 1 | 1 | 6 |
| MIOX    | 1 | 1 | 1 | 0 | 1 | 1 | 1 | 6 |
| CACNB2  | 1 | 1 | 1 | 0 | 1 | 1 | 1 | 6 |
| RAPGEF4 | 1 | 1 | 1 | 0 | 1 | 1 | 1 | 6 |
| GBP4    | 1 | 1 | 1 | 0 | 1 | 1 | 1 | 6 |
| MEOX2   | 1 | 1 | 1 | 0 | 1 | 1 | 1 | 6 |
| IPCEF1  | 1 | 1 | 1 | 0 | 1 | 1 | 1 | 6 |
| FHL5    | 1 | 1 | 1 | 0 | 1 | 1 | 1 | 6 |
| XK      | 1 | 1 | 1 | 0 | 1 | 1 | 1 | 6 |
| MYOM1   | 1 | 1 | 1 | 0 | 1 | 1 | 1 | 6 |

|           |   |   |   |   |   |   |   |   |
|-----------|---|---|---|---|---|---|---|---|
| C2orf73   | 1 | 1 | 1 | 0 | 1 | 1 | 1 | 6 |
| SMAD5OS   | 1 | 1 | 1 | 0 | 1 | 1 | 1 | 6 |
| SLC16A2   | 1 | 1 | 1 | 0 | 1 | 1 | 1 | 6 |
| GPR98     | 1 | 1 | 1 | 0 | 1 | 1 | 1 | 6 |
| LRP2      | 1 | 1 | 1 | 0 | 1 | 1 | 1 | 6 |
| SYN3      | 1 | 1 | 1 | 0 | 1 | 1 | 1 | 6 |
| SLC26A4   | 1 | 1 | 1 | 0 | 1 | 1 | 1 | 6 |
| SHANK2    | 1 | 1 | 1 | 0 | 1 | 1 | 1 | 6 |
| MATN2     | 1 | 1 | 1 | 0 | 1 | 1 | 1 | 6 |
| AVPR1A    | 1 | 1 | 1 | 0 | 1 | 1 | 1 | 6 |
| RBM20     | 1 | 1 | 1 | 0 | 1 | 1 | 1 | 6 |
| IL22RA1   | 1 | 1 | 1 | 0 | 1 | 1 | 1 | 6 |
| CLEC9A    | 1 | 1 | 1 | 0 | 1 | 1 | 1 | 6 |
| MT1F      | 1 | 1 | 1 | 0 | 1 | 1 | 1 | 6 |
| TSPAN33   | 1 | 1 | 1 | 0 | 1 | 1 | 1 | 6 |
| STXBP5L   | 1 | 1 | 1 | 0 | 1 | 1 | 1 | 6 |
| RXFP1     | 1 | 1 | 1 | 0 | 1 | 1 | 1 | 6 |
| SLC26A7   | 1 | 1 | 1 | 0 | 1 | 1 | 1 | 6 |
| IP6K3     | 1 | 1 | 1 | 0 | 1 | 1 | 1 | 6 |
| C15orf51  | 1 | 1 | 1 | 0 | 1 | 1 | 1 | 6 |
| ARHGAP28  | 1 | 1 | 1 | 0 | 1 | 1 | 1 | 6 |
| LOC201651 | 1 | 1 | 1 | 0 | 1 | 1 | 1 | 6 |
| RGS9      | 1 | 1 | 1 | 0 | 1 | 1 | 1 | 6 |
| LRP1B     | 1 | 1 | 1 | 0 | 1 | 1 | 1 | 6 |
| FAM13C    | 1 | 1 | 1 | 0 | 1 | 1 | 1 | 6 |
| RANBP3L   | 1 | 1 | 1 | 0 | 1 | 1 | 1 | 6 |
| ELMO1     | 1 | 1 | 1 | 0 | 1 | 1 | 1 | 6 |
| LGI3      | 1 | 1 | 1 | 0 | 1 | 1 | 1 | 6 |
| SLC5A4    | 1 | 1 | 1 | 0 | 1 | 1 | 1 | 6 |
| B3GALT2   | 1 | 1 | 1 | 0 | 1 | 1 | 1 | 6 |

|            |   |   |   |   |   |   |   |   |
|------------|---|---|---|---|---|---|---|---|
| PTPRQ      | 1 | 1 | 1 | 0 | 1 | 1 | 1 | 6 |
| CDHR1      | 1 | 1 | 1 | 0 | 1 | 1 | 1 | 6 |
| KCNC1      | 1 | 1 | 0 | 1 | 1 | 1 | 1 | 6 |
| RIMKLA     | 1 | 1 | 1 | 0 | 1 | 1 | 1 | 6 |
| TMEM171    | 1 | 1 | 1 | 0 | 1 | 1 | 1 | 6 |
| GRB14      | 1 | 1 | 1 | 0 | 1 | 1 | 1 | 6 |
| HOXA2      | 1 | 1 | 1 | 0 | 1 | 1 | 1 | 6 |
| SLC1A2     | 1 | 1 | 1 | 0 | 1 | 1 | 1 | 6 |
| SORCS1     | 1 | 1 | 1 | 0 | 1 | 1 | 1 | 6 |
| ARHGAP24   | 1 | 1 | 1 | 0 | 1 | 1 | 1 | 6 |
| DLX1       | 1 | 1 | 1 | 0 | 1 | 1 | 1 | 6 |
| PLA1A      | 1 | 1 | 1 | 0 | 1 | 1 | 1 | 6 |
| LOC1001281 | 1 | 1 | 1 | 0 | 1 | 1 | 1 | 6 |
| MT1H       | 1 | 1 | 1 | 0 | 1 | 1 | 1 | 6 |
| MAOB       | 1 | 1 | 1 | 0 | 1 | 1 | 1 | 6 |
| KCNJ10     | 1 | 1 | 1 | 0 | 1 | 1 | 1 | 6 |
| PTCH2      | 1 | 1 | 1 | 0 | 1 | 1 | 1 | 6 |
| KHDRBS2    | 1 | 1 | 1 | 0 | 1 | 1 | 1 | 6 |
| RADIL      | 1 | 1 | 1 | 0 | 1 | 1 | 1 | 6 |
| INPP5J     | 1 | 1 | 1 | 0 | 1 | 1 | 1 | 6 |
| MAPK4      | 1 | 1 | 0 | 1 | 1 | 1 | 1 | 6 |
| MLC1       | 1 | 1 | 1 | 0 | 1 | 1 | 1 | 6 |
| DHDPSL     | 1 | 1 | 1 | 0 | 1 | 1 | 1 | 6 |
| DPY19L2    | 1 | 1 | 1 | 0 | 1 | 1 | 1 | 6 |
| MT1M       | 1 | 1 | 1 | 0 | 1 | 1 | 1 | 6 |
| LOC400043  | 1 | 1 | 1 | 0 | 1 | 1 | 1 | 6 |
| TMEM38A    | 0 | 1 | 1 | 1 | 1 | 1 | 1 | 6 |
| L3MBTL4    | 0 | 1 | 1 | 1 | 1 | 1 | 1 | 6 |
| AKR1C2     | 0 | 1 | 1 | 1 | 1 | 1 | 1 | 6 |
| DPT        | 0 | 1 | 1 | 1 | 1 | 1 | 1 | 6 |

|           |   |   |   |   |   |   |   |   |
|-----------|---|---|---|---|---|---|---|---|
| TRPV4     | 0 | 1 | 1 | 1 | 1 | 1 | 1 | 6 |
| ANK1      | 0 | 1 | 1 | 1 | 1 | 1 | 1 | 6 |
| GPC3      | 0 | 1 | 1 | 1 | 1 | 1 | 1 | 6 |
| PRKCB     | 0 | 1 | 1 | 1 | 1 | 1 | 1 | 6 |
| PRKCA     | 0 | 1 | 1 | 1 | 1 | 1 | 1 | 6 |
| GPR17     | 1 | 1 | 0 | 0 | 1 | 1 | 1 | 5 |
| EXOC3L    | 1 | 1 | 0 | 0 | 1 | 1 | 1 | 5 |
| EMID1     | 1 | 1 | 0 | 0 | 1 | 1 | 1 | 5 |
| TMSB15A   | 1 | 1 | 1 | 0 | 1 | 1 | 0 | 5 |
| PCDHB15   | 1 | 1 | 1 | 0 | 1 | 1 | 0 | 5 |
| AVPR2     | 1 | 1 | 1 | 0 | 1 | 0 | 1 | 5 |
| CD36      | 1 | 1 | 1 | 0 | 1 | 0 | 1 | 5 |
| COL9A1    | 1 | 1 | 0 | 0 | 1 | 1 | 1 | 5 |
| HS6ST3    | 1 | 1 | 0 | 0 | 1 | 1 | 1 | 5 |
| FOXJ1     | 1 | 1 | 0 | 0 | 1 | 1 | 1 | 5 |
| GRRP1     | 1 | 1 | 0 | 0 | 1 | 1 | 1 | 5 |
| FAM155B   | 1 | 1 | 0 | 0 | 1 | 1 | 1 | 5 |
| KATNAL2   | 1 | 1 | 0 | 0 | 1 | 1 | 1 | 5 |
| LILRB5    | 1 | 1 | 1 | 0 | 1 | 0 | 1 | 5 |
| CCDC48    | 1 | 1 | 1 | 0 | 1 | 1 | 0 | 5 |
| COL25A1   | 1 | 1 | 0 | 0 | 1 | 1 | 1 | 5 |
| LOC151174 | 1 | 1 | 1 | 0 | 0 | 1 | 1 | 5 |
| PYGM      | 1 | 1 | 0 | 0 | 1 | 1 | 1 | 5 |
| COLEC10   | 1 | 1 | 0 | 0 | 1 | 1 | 1 | 5 |
| C19orf35  | 1 | 1 | 1 | 0 | 1 | 0 | 1 | 5 |
| QRICH2    | 1 | 1 | 0 | 0 | 1 | 1 | 1 | 5 |
| EFHC2     | 1 | 1 | 0 | 0 | 1 | 1 | 1 | 5 |
| C16orf74  | 1 | 1 | 0 | 0 | 1 | 1 | 1 | 5 |
| ME1       | 1 | 1 | 0 | 0 | 1 | 1 | 1 | 5 |
| WFDC1     | 1 | 1 | 1 | 0 | 1 | 0 | 1 | 5 |

|           |   |   |   |   |   |   |   |   |
|-----------|---|---|---|---|---|---|---|---|
| LOC400759 | 1 | 1 | 1 | 0 | 0 | 1 | 1 | 5 |
| SCN3B     | 1 | 1 | 0 | 0 | 1 | 1 | 1 | 5 |
| AGMAT     | 1 | 1 | 0 | 0 | 1 | 1 | 1 | 5 |
| TDO2      | 1 | 1 | 0 | 0 | 1 | 1 | 1 | 5 |
| TCF7L1    | 1 | 1 | 0 | 0 | 1 | 1 | 1 | 5 |
| SERHL2    | 1 | 1 | 0 | 0 | 1 | 1 | 1 | 5 |
| CORO2B    | 1 | 1 | 0 | 1 | 1 | 1 | 0 | 5 |
| FOXF2     | 1 | 1 | 0 | 0 | 1 | 1 | 1 | 5 |
| PFKFB1    | 1 | 1 | 0 | 0 | 1 | 1 | 1 | 5 |
| MYH3      | 1 | 1 | 0 | 0 | 1 | 1 | 1 | 5 |
| FGFBP2    | 1 | 1 | 1 | 0 | 1 | 0 | 1 | 5 |
| SLC25A34  | 1 | 1 | 0 | 0 | 1 | 1 | 1 | 5 |
| BOC       | 1 | 1 | 0 | 0 | 1 | 1 | 1 | 5 |
| CACNA2D2  | 1 | 1 | 0 | 0 | 1 | 1 | 1 | 5 |
| GPX3      | 1 | 1 | 0 | 0 | 1 | 1 | 1 | 5 |
| ZNF323    | 1 | 1 | 1 | 0 | 1 | 1 | 0 | 5 |
| FAM167A   | 1 | 1 | 0 | 1 | 1 | 1 | 0 | 5 |
| ZNF521    | 1 | 1 | 0 | 0 | 1 | 1 | 1 | 5 |
| ZNF541    | 1 | 1 | 0 | 0 | 1 | 1 | 1 | 5 |
| SELP      | 1 | 1 | 1 | 0 | 1 | 0 | 1 | 5 |
| MYH11     | 1 | 1 | 0 | 0 | 1 | 1 | 1 | 5 |
| PAPSS2    | 0 | 1 | 1 | 1 | 1 | 0 | 1 | 5 |
| RGNEF     | 0 | 1 | 1 | 0 | 1 | 1 | 1 | 5 |
| CR2       | 0 | 1 | 1 | 0 | 1 | 1 | 1 | 5 |
| F10       | 0 | 1 | 1 | 0 | 1 | 1 | 1 | 5 |
| TNFRSF11B | 0 | 1 | 0 | 1 | 1 | 1 | 1 | 5 |
| HAND2     | 0 | 1 | 1 | 1 | 1 | 1 | 0 | 5 |
| MS4A1     | 0 | 1 | 1 | 0 | 1 | 1 | 1 | 5 |
| ADAM22    | 0 | 1 | 1 | 1 | 1 | 0 | 1 | 5 |
| C9orf122  | 0 | 1 | 1 | 0 | 1 | 1 | 1 | 5 |



|           |   |   |   |   |   |   |   |   |
|-----------|---|---|---|---|---|---|---|---|
| LRMP      | 0 | 1 | 1 | 0 | 1 | 1 | 1 | 5 |
| BMX       | 0 | 1 | 1 | 0 | 1 | 1 | 1 | 5 |
| C6orf165  | 0 | 1 | 1 | 0 | 1 | 1 | 1 | 5 |
| AQP4      | 0 | 1 | 1 | 0 | 1 | 1 | 1 | 5 |
| ADH1B     | 0 | 1 | 1 | 1 | 1 | 0 | 1 | 5 |
| C3orf55   | 0 | 1 | 1 | 1 | 1 | 0 | 1 | 5 |
| PREX2     | 0 | 1 | 1 | 1 | 1 | 0 | 1 | 5 |
| CD27      | 0 | 1 | 1 | 0 | 1 | 1 | 1 | 5 |
| LRRC2     | 0 | 1 | 1 | 0 | 1 | 1 | 1 | 5 |
| DPY19L2P4 | 0 | 1 | 1 | 0 | 1 | 1 | 1 | 5 |
| FREM2     | 0 | 1 | 1 | 0 | 1 | 1 | 1 | 5 |
| ABCG2     | 1 | 1 | 1 | 0 | 1 | 0 | 0 | 4 |
| GPER      | 1 | 1 | 0 | 0 | 1 | 1 | 0 | 4 |
| C13orf15  | 1 | 1 | 0 | 0 | 1 | 1 | 0 | 4 |
| HRC       | 1 | 1 | 1 | 0 | 1 | 0 | 0 | 4 |
| KCNIP3    | 1 | 1 | 0 | 0 | 1 | 1 | 0 | 4 |
| TSPAN7    | 1 | 1 | 0 | 0 | 1 | 1 | 0 | 4 |
| DUOXA2    | 1 | 1 | 0 | 0 | 0 | 1 | 1 | 4 |
| ASCL2     | 1 | 1 | 0 | 0 | 0 | 1 | 1 | 4 |
| LOC728264 | 1 | 1 | 0 | 0 | 1 | 1 | 0 | 4 |
| THSD7B    | 1 | 1 | 0 | 0 | 1 | 1 | 0 | 4 |
| ATP1B2    | 1 | 1 | 0 | 0 | 1 | 1 | 0 | 4 |
| C14orf50  | 1 | 1 | 0 | 0 | 0 | 1 | 1 | 4 |
| GPR83     | 1 | 1 | 0 | 0 | 1 | 1 | 0 | 4 |
| PKNOX2    | 1 | 1 | 0 | 0 | 1 | 1 | 0 | 4 |
| EDA       | 1 | 1 | 0 | 0 | 1 | 1 | 0 | 4 |
| DEPDC6    | 1 | 1 | 0 | 0 | 1 | 1 | 0 | 4 |
| FAM181B   | 1 | 1 | 0 | 0 | 1 | 1 | 0 | 4 |
| OXCT2     | 1 | 1 | 0 | 0 | 1 | 1 | 0 | 4 |
| FABP4     | 1 | 1 | 0 | 0 | 1 | 0 | 1 | 4 |

|          |   |   |   |   |   |   |   |   |
|----------|---|---|---|---|---|---|---|---|
| FBXO15   | 1 | 1 | 0 | 0 | 1 | 1 | 0 | 4 |
| SLC5A5   | 1 | 1 | 1 | 0 | 1 | 0 | 0 | 4 |
| SLC29A4  | 1 | 1 | 0 | 0 | 1 | 1 | 0 | 4 |
| C16orf89 | 1 | 1 | 0 | 0 | 1 | 1 | 0 | 4 |
| FGF12    | 1 | 1 | 0 | 0 | 1 | 1 | 0 | 4 |
| TMC3     | 1 | 1 | 0 | 0 | 1 | 1 | 0 | 4 |
| SDF2L1   | 1 | 1 | 0 | 0 | 1 | 1 | 0 | 4 |
| TSPAN18  | 1 | 1 | 0 | 0 | 1 | 1 | 0 | 4 |
| GZMM     | 1 | 1 | 1 | 0 | 0 | 0 | 1 | 4 |
| WDR63    | 1 | 1 | 0 | 0 | 1 | 0 | 1 | 4 |
| JPH4     | 1 | 1 | 0 | 0 | 1 | 0 | 1 | 4 |
| EYA4     | 1 | 1 | 0 | 0 | 1 | 1 | 0 | 4 |
| CLMN     | 1 | 1 | 0 | 0 | 1 | 1 | 0 | 4 |
| PPP1R3C  | 1 | 1 | 0 | 1 | 1 | 0 | 0 | 4 |
| CPNE5    | 1 | 1 | 0 | 0 | 1 | 0 | 1 | 4 |
| TDH      | 1 | 1 | 0 | 0 | 1 | 1 | 0 | 4 |
| FGD2     | 1 | 1 | 0 | 0 | 1 | 0 | 1 | 4 |
| TPO      | 0 | 1 | 0 | 0 | 1 | 1 | 1 | 4 |
| BMP8A    | 0 | 1 | 0 | 0 | 1 | 1 | 1 | 4 |
| MYCN     | 0 | 1 | 1 | 0 | 1 | 0 | 1 | 4 |
| FMO2     | 0 | 1 | 1 | 0 | 1 | 0 | 1 | 4 |
| KCNA3    | 0 | 1 | 1 | 0 | 1 | 0 | 1 | 4 |
| ATRNL1   | 0 | 1 | 0 | 0 | 1 | 1 | 1 | 4 |
| MASP1    | 0 | 1 | 1 | 0 | 1 | 0 | 1 | 4 |
| DDIT4L   | 0 | 1 | 0 | 1 | 1 | 1 | 0 | 4 |
| ASXL3    | 0 | 1 | 0 | 0 | 1 | 1 | 1 | 4 |
| SPARCL1  | 0 | 1 | 1 | 0 | 1 | 0 | 1 | 4 |
| PID1     | 0 | 1 | 1 | 0 | 1 | 0 | 1 | 4 |
| GPR37L1  | 0 | 1 | 0 | 0 | 1 | 1 | 1 | 4 |
| UPF0639  | 0 | 1 | 1 | 0 | 1 | 1 | 0 | 4 |

|          |   |   |   |   |   |   |   |   |
|----------|---|---|---|---|---|---|---|---|
| LRRC4C   | 0 | 1 | 0 | 0 | 1 | 1 | 1 | 4 |
| ANKRD29  | 0 | 1 | 1 | 0 | 1 | 0 | 1 | 4 |
| C12orf39 | 0 | 1 | 0 | 0 | 1 | 1 | 1 | 4 |
| C7orf58  | 0 | 1 | 1 | 0 | 1 | 0 | 1 | 4 |
| RTN1     | 0 | 1 | 0 | 1 | 1 | 0 | 1 | 4 |
| COCH     | 0 | 1 | 0 | 1 | 1 | 0 | 1 | 4 |
| CACNA2D3 | 0 | 1 | 0 | 0 | 1 | 1 | 1 | 4 |
| CCDC68   | 0 | 1 | 0 | 1 | 1 | 0 | 1 | 4 |
| C9orf152 | 0 | 1 | 0 | 0 | 1 | 1 | 1 | 4 |
| NCF1B    | 0 | 1 | 1 | 0 | 1 | 0 | 1 | 4 |
| AR       | 0 | 1 | 0 | 0 | 1 | 1 | 1 | 4 |
| RBP5     | 0 | 1 | 0 | 0 | 1 | 1 | 1 | 4 |
| FAM3D    | 1 | 1 | 0 | 0 | 0 | 1 | 0 | 3 |
| ROPN1B   | 1 | 1 | 0 | 0 | 1 | 0 | 0 | 3 |
| GALNT14  | 1 | 1 | 0 | 0 | 1 | 0 | 0 | 3 |
| DLX6     | 1 | 1 | 0 | 0 | 0 | 1 | 0 | 3 |
| GLIPR1L2 | 1 | 1 | 0 | 0 | 0 | 1 | 0 | 3 |
| TXNDC6   | 1 | 1 | 0 | 0 | 0 | 1 | 0 | 3 |
| TMEM90B  | 1 | 1 | 0 | 0 | 1 | 0 | 0 | 3 |
| FLT1     | 1 | 1 | 0 | 0 | 1 | 0 | 0 | 3 |
| DNALI1   | 1 | 1 | 0 | 0 | 0 | 1 | 0 | 3 |
| BEGAIN   | 1 | 1 | 0 | 0 | 1 | 0 | 0 | 3 |
| COL9A3   | 1 | 1 | 0 | 0 | 1 | 0 | 0 | 3 |
| C3orf36  | 1 | 1 | 0 | 0 | 1 | 0 | 0 | 3 |
| PURG     | 1 | 1 | 0 | 0 | 1 | 0 | 0 | 3 |
| COX7A1   | 1 | 1 | 0 | 0 | 1 | 0 | 0 | 3 |
| TBX21    | 1 | 1 | 0 | 0 | 0 | 0 | 1 | 3 |
| AOC3     | 1 | 1 | 0 | 0 | 1 | 0 | 0 | 3 |
| EDN2     | 1 | 1 | 0 | 0 | 1 | 0 | 0 | 3 |
| KLF2     | 1 | 1 | 0 | 0 | 1 | 0 | 0 | 3 |

|           |   |   |   |   |   |   |   |   |
|-----------|---|---|---|---|---|---|---|---|
| DACH2     | 1 | 1 | 0 | 0 | 0 | 1 | 0 | 3 |
| NPR1      | 1 | 1 | 0 | 0 | 1 | 0 | 0 | 3 |
| AKR1C1    | 0 | 1 | 0 | 0 | 1 | 1 | 0 | 3 |
| OSBPL6    | 0 | 1 | 0 | 0 | 1 | 1 | 0 | 3 |
| SLC17A7   | 0 | 1 | 0 | 0 | 1 | 1 | 0 | 3 |
| OLFM2     | 0 | 1 | 0 | 0 | 1 | 1 | 0 | 3 |
| GCSH      | 0 | 1 | 0 | 0 | 1 | 1 | 0 | 3 |
| LRRC55    | 0 | 1 | 0 | 0 | 1 | 0 | 1 | 3 |
| SSPO      | 0 | 1 | 0 | 0 | 1 | 1 | 0 | 3 |
| EPB41L3   | 0 | 1 | 0 | 0 | 1 | 0 | 1 | 3 |
| SH2D6     | 0 | 1 | 1 | 0 | 1 | 0 | 0 | 3 |
| CAPSL     | 0 | 1 | 0 | 0 | 1 | 1 | 0 | 3 |
| EOMES     | 0 | 1 | 1 | 0 | 0 | 0 | 1 | 3 |
| C1QTNF2   | 0 | 1 | 0 | 0 | 1 | 1 | 0 | 3 |
| TSNAXIP1  | 0 | 1 | 0 | 0 | 1 | 1 | 0 | 3 |
| C8orf84   | 0 | 1 | 0 | 0 | 1 | 0 | 1 | 3 |
| LOC283174 | 0 | 1 | 0 | 0 | 1 | 1 | 0 | 3 |
| COL14A1   | 0 | 1 | 0 | 0 | 1 | 1 | 0 | 3 |
| COL4A6    | 0 | 1 | 0 | 0 | 1 | 1 | 0 | 3 |
| KCNK2     | 0 | 1 | 0 | 0 | 1 | 1 | 0 | 3 |
| CDCA7     | 0 | 1 | 0 | 0 | 1 | 0 | 1 | 3 |
| NRG2      | 0 | 1 | 0 | 0 | 1 | 1 | 0 | 3 |
| TRPV6     | 0 | 1 | 0 | 0 | 1 | 1 | 0 | 3 |
| ABCC8     | 0 | 1 | 0 | 0 | 0 | 1 | 1 | 3 |
| ITGA8     | 0 | 1 | 0 | 1 | 1 | 0 | 0 | 3 |
| TPPP      | 0 | 1 | 0 | 0 | 1 | 1 | 0 | 3 |
| CECR1     | 0 | 1 | 0 | 0 | 0 | 1 | 1 | 3 |
| INHBC     | 0 | 1 | 1 | 0 | 1 | 0 | 0 | 3 |
| NOL4      | 0 | 1 | 0 | 0 | 1 | 1 | 0 | 3 |
| ANKRD20B  | 0 | 1 | 0 | 0 | 1 | 1 | 0 | 3 |

|             |   |   |   |   |   |   |   |   |
|-------------|---|---|---|---|---|---|---|---|
| SSTR1       | 0 | 1 | 0 | 0 | 1 | 1 | 0 | 3 |
| UGT8        | 0 | 1 | 0 | 1 | 1 | 0 | 0 | 3 |
| GOLGA9P     | 0 | 1 | 0 | 0 | 1 | 1 | 0 | 3 |
| LOC1001297  | 0 | 1 | 0 | 0 | 1 | 1 | 0 | 3 |
| PKDCC       | 0 | 1 | 0 | 0 | 1 | 1 | 0 | 3 |
| ADCY1       | 0 | 1 | 0 | 1 | 1 | 0 | 0 | 3 |
| SLC6A17     | 0 | 1 | 0 | 1 | 1 | 0 | 0 | 3 |
| NPL         | 0 | 1 | 0 | 0 | 1 | 0 | 1 | 3 |
| C1orf127    | 0 | 1 | 0 | 0 | 1 | 1 | 0 | 3 |
| MMRN1       | 0 | 1 | 0 | 0 | 1 | 0 | 1 | 3 |
| DNAH9       | 0 | 1 | 0 | 0 | 1 | 1 | 0 | 3 |
| PROX1       | 0 | 1 | 0 | 1 | 1 | 0 | 0 | 3 |
| LOC342346   | 0 | 1 | 0 | 0 | 1 | 1 | 0 | 3 |
| CDYL2       | 0 | 1 | 0 | 1 | 1 | 0 | 0 | 3 |
| C10orf79    | 0 | 1 | 0 | 0 | 1 | 1 | 0 | 3 |
| FGL2        | 0 | 1 | 0 | 0 | 1 | 0 | 1 | 3 |
| CYP46A1     | 0 | 1 | 0 | 0 | 1 | 1 | 0 | 3 |
| FAM26F      | 0 | 1 | 1 | 0 | 0 | 0 | 1 | 3 |
| FAM95B1     | 0 | 1 | 0 | 0 | 1 | 1 | 0 | 3 |
| DOC2A       | 0 | 0 | 0 | 0 | 1 | 1 | 1 | 3 |
| DLEU7       | 0 | 0 | 0 | 0 | 1 | 1 | 1 | 3 |
| HIGD1B      | 1 | 1 | 0 | 0 | 0 | 0 | 0 | 2 |
| TBXA2R      | 1 | 1 | 0 | 0 | 0 | 0 | 0 | 2 |
| NMUR2       | 1 | 1 | 0 | 0 | 0 | 0 | 0 | 2 |
| SDPR        | 1 | 1 | 0 | 0 | 0 | 0 | 0 | 2 |
| RGS5        | 1 | 1 | 0 | 0 | 0 | 0 | 0 | 2 |
| SCG3        | 1 | 1 | 0 | 0 | 0 | 0 | 0 | 2 |
| ST6GALNAC11 | 1 | 1 | 0 | 0 | 0 | 0 | 0 | 2 |
| VAV3        | 1 | 0 | 0 | 0 | 0 | 0 | 1 | 2 |
| SUCNR1      | 0 | 1 | 0 | 0 | 1 | 0 | 0 | 2 |

|          |   |   |   |   |   |   |   |   |
|----------|---|---|---|---|---|---|---|---|
| SGCD     | 0 | 1 | 0 | 0 | 1 | 0 | 0 | 2 |
| FBXO17   | 0 | 1 | 0 | 0 | 1 | 0 | 0 | 2 |
| ACSL6    | 0 | 1 | 0 | 0 | 1 | 0 | 0 | 2 |
| CYP7B1   | 0 | 1 | 0 | 0 | 1 | 0 | 0 | 2 |
| ART5     | 0 | 1 | 0 | 0 | 0 | 0 | 1 | 2 |
| BLK      | 0 | 1 | 0 | 0 | 1 | 0 | 0 | 2 |
| HOXA3    | 0 | 1 | 0 | 0 | 1 | 0 | 0 | 2 |
| LRRN2    | 0 | 1 | 0 | 0 | 0 | 1 | 0 | 2 |
| HKDC1    | 0 | 1 | 0 | 0 | 1 | 0 | 0 | 2 |
| LMOD1    | 0 | 1 | 0 | 0 | 1 | 0 | 0 | 2 |
| MAB21L1  | 0 | 1 | 0 | 0 | 1 | 0 | 0 | 2 |
| CSMD2    | 0 | 1 | 0 | 0 | 1 | 0 | 0 | 2 |
| CYP26B1  | 0 | 1 | 0 | 0 | 1 | 0 | 0 | 2 |
| CDHR3    | 0 | 1 | 0 | 0 | 1 | 0 | 0 | 2 |
| PRIMA1   | 0 | 1 | 0 | 0 | 1 | 0 | 0 | 2 |
| GGTLC1   | 0 | 1 | 0 | 0 | 0 | 1 | 0 | 2 |
| SCUBE2   | 0 | 1 | 0 | 0 | 1 | 0 | 0 | 2 |
| BVES     | 0 | 1 | 0 | 0 | 1 | 0 | 0 | 2 |
| HS3ST3B1 | 0 | 1 | 0 | 0 | 1 | 0 | 0 | 2 |
| DHH      | 0 | 1 | 0 | 0 | 1 | 0 | 0 | 2 |
| SLITRK5  | 0 | 1 | 0 | 0 | 1 | 0 | 0 | 2 |
| SUSD5    | 0 | 1 | 0 | 0 | 1 | 0 | 0 | 2 |
| SLC24A3  | 0 | 1 | 0 | 0 | 1 | 0 | 0 | 2 |
| ROPN1L   | 0 | 1 | 0 | 0 | 1 | 0 | 0 | 2 |
| LGI4     | 0 | 1 | 0 | 0 | 1 | 0 | 0 | 2 |
| PCDP1    | 0 | 1 | 0 | 0 | 1 | 0 | 0 | 2 |
| PLAC9    | 0 | 1 | 0 | 0 | 1 | 0 | 0 | 2 |
| HECW2    | 0 | 1 | 0 | 0 | 1 | 0 | 0 | 2 |
| SMOC2    | 0 | 1 | 0 | 0 | 1 | 0 | 0 | 2 |
| PCBP3    | 0 | 1 | 0 | 0 | 1 | 0 | 0 | 2 |

|          |   |   |   |   |   |   |   |   |
|----------|---|---|---|---|---|---|---|---|
| ANK2     | 0 | 1 | 0 | 0 | 1 | 0 | 0 | 2 |
| EDN3     | 0 | 1 | 0 | 0 | 0 | 1 | 0 | 2 |
| ART4     | 0 | 1 | 0 | 0 | 1 | 0 | 0 | 2 |
| AOC2     | 0 | 1 | 0 | 0 | 1 | 0 | 0 | 2 |
| C1QTNF7  | 0 | 1 | 0 | 0 | 1 | 0 | 0 | 2 |
| GRAPL    | 0 | 1 | 0 | 0 | 1 | 0 | 0 | 2 |
| SCUBE1   | 0 | 1 | 0 | 0 | 1 | 0 | 0 | 2 |
| HSPB6    | 0 | 1 | 0 | 0 | 1 | 0 | 0 | 2 |
| RNF150   | 0 | 1 | 0 | 0 | 1 | 0 | 0 | 2 |
| NEB      | 0 | 1 | 0 | 0 | 1 | 0 | 0 | 2 |
| TCEAL2   | 0 | 1 | 0 | 0 | 0 | 1 | 0 | 2 |
| RFPL1S   | 0 | 1 | 0 | 1 | 0 | 0 | 0 | 2 |
| AKR1E2   | 0 | 1 | 0 | 0 | 1 | 0 | 0 | 2 |
| OTOS     | 0 | 1 | 0 | 0 | 1 | 0 | 0 | 2 |
| FLJ35024 | 0 | 1 | 0 | 0 | 1 | 0 | 0 | 2 |
| IL33     | 0 | 1 | 0 | 0 | 1 | 0 | 0 | 2 |
| EPHA3    | 0 | 1 | 0 | 0 | 1 | 0 | 0 | 2 |
| DENND2A  | 0 | 1 | 0 | 0 | 1 | 0 | 0 | 2 |
| C1QTNF9  | 0 | 1 | 0 | 0 | 1 | 0 | 0 | 2 |
| SYBU     | 0 | 1 | 0 | 0 | 1 | 0 | 0 | 2 |
| BTBD11   | 0 | 1 | 0 | 0 | 1 | 0 | 0 | 2 |
| CHST8    | 0 | 1 | 0 | 0 | 1 | 0 | 0 | 2 |
| PPM1L    | 0 | 1 | 0 | 0 | 1 | 0 | 0 | 2 |
| TRPM6    | 0 | 1 | 0 | 0 | 1 | 0 | 0 | 2 |
| FMOD     | 0 | 1 | 0 | 0 | 1 | 0 | 0 | 2 |
| FAM166B  | 0 | 1 | 0 | 0 | 0 | 1 | 0 | 2 |
| TPTE2P1  | 0 | 1 | 0 | 0 | 0 | 1 | 0 | 2 |
| BCL11B   | 0 | 1 | 0 | 0 | 1 | 0 | 0 | 2 |
| C9orf66  | 0 | 1 | 0 | 0 | 0 | 1 | 0 | 2 |
| CHRD     | 0 | 1 | 0 | 0 | 1 | 0 | 0 | 2 |

|           |   |   |   |   |   |   |   |   |
|-----------|---|---|---|---|---|---|---|---|
| ENPP3     | 0 | 1 | 0 | 0 | 0 | 1 | 0 | 2 |
| GLT8D2    | 0 | 1 | 0 | 0 | 1 | 0 | 0 | 2 |
| KIF1A     | 0 | 1 | 0 | 0 | 1 | 0 | 0 | 2 |
| DOCK10    | 0 | 1 | 0 | 0 | 0 | 0 | 1 | 2 |
| LRFN1     | 0 | 1 | 0 | 0 | 1 | 0 | 0 | 2 |
| ABCC4     | 0 | 1 | 0 | 0 | 1 | 0 | 0 | 2 |
| GNAL      | 0 | 1 | 0 | 0 | 1 | 0 | 0 | 2 |
| EDARADD   | 0 | 1 | 0 | 0 | 1 | 0 | 0 | 2 |
| C20orf26  | 0 | 1 | 0 | 0 | 1 | 0 | 0 | 2 |
| PDE11A    | 0 | 1 | 0 | 0 | 1 | 0 | 0 | 2 |
| PTGDS     | 0 | 1 | 0 | 0 | 1 | 0 | 0 | 2 |
| FAM129C   | 0 | 1 | 0 | 0 | 1 | 0 | 0 | 2 |
| C10orf128 | 0 | 1 | 0 | 0 | 1 | 0 | 0 | 2 |
| DNAJC12   | 0 | 1 | 0 | 0 | 1 | 0 | 0 | 2 |
| ST8SIA1   | 0 | 1 | 0 | 0 | 1 | 0 | 0 | 2 |
| RASGRP2   | 0 | 1 | 0 | 0 | 1 | 0 | 0 | 2 |
| ATP6V1G2  | 0 | 1 | 0 | 0 | 0 | 1 | 0 | 2 |
| CPXM2     | 0 | 1 | 0 | 0 | 1 | 0 | 0 | 2 |
| ISLR2     | 0 | 1 | 0 | 0 | 1 | 0 | 0 | 2 |
| HRH2      | 0 | 0 | 0 | 1 | 1 | 0 | 0 | 2 |
| FLRT2     | 0 | 0 | 0 | 0 | 1 | 1 | 0 | 2 |
| GYG2      | 0 | 0 | 0 | 0 | 1 | 1 | 0 | 2 |
| FAM19A1   | 0 | 0 | 0 | 0 | 1 | 1 | 0 | 2 |
| CD163L1   | 0 | 0 | 0 | 0 | 1 | 0 | 1 | 2 |
| PLB1      | 0 | 0 | 0 | 0 | 1 | 0 | 1 | 2 |
| ANKRD20A3 | 0 | 0 | 0 | 0 | 1 | 1 | 0 | 2 |
| GPR62     | 0 | 0 | 0 | 0 | 0 | 1 | 1 | 2 |
| CX3CR1    | 1 | 0 | 0 | 0 | 0 | 0 | 0 | 1 |
| HCRTR1    | 1 | 0 | 0 | 0 | 0 | 0 | 0 | 1 |
| LOC134466 | 1 | 0 | 0 | 0 | 0 | 0 | 0 | 1 |



|           |   |   |   |   |   |   |   |   |
|-----------|---|---|---|---|---|---|---|---|
| CKMT2     | 1 | 0 | 0 | 0 | 0 | 0 | 0 | 1 |
| ASPA      | 1 | 0 | 0 | 0 | 0 | 0 | 0 | 1 |
| LIN7A     | 1 | 0 | 0 | 0 | 0 | 0 | 0 | 1 |
| NDUFA4L2  | 1 | 0 | 0 | 0 | 0 | 0 | 0 | 1 |
| SYT6      | 1 | 0 | 0 | 0 | 0 | 0 | 0 | 1 |
| COX4I2    | 1 | 0 | 0 | 0 | 0 | 0 | 0 | 1 |
| RNF157    | 1 | 0 | 0 | 0 | 0 | 0 | 0 | 1 |
| DUSP27    | 1 | 0 | 0 | 0 | 0 | 0 | 0 | 1 |
| MYCBPAP   | 1 | 0 | 0 | 0 | 0 | 0 | 0 | 1 |
| ABCG4     | 1 | 0 | 0 | 0 | 0 | 0 | 0 | 1 |
| SLC4A5    | 0 | 1 | 0 | 0 | 0 | 0 | 0 | 1 |
| CD8A      | 0 | 1 | 0 | 0 | 0 | 0 | 0 | 1 |
| VPREB3    | 0 | 1 | 0 | 0 | 0 | 0 | 0 | 1 |
| DCLK3     | 0 | 1 | 0 | 0 | 0 | 0 | 0 | 1 |
| GALNT9    | 0 | 1 | 0 | 0 | 0 | 0 | 0 | 1 |
| BST2      | 0 | 1 | 0 | 0 | 0 | 0 | 0 | 1 |
| WDR65     | 0 | 1 | 0 | 0 | 0 | 0 | 0 | 1 |
| PRR18     | 0 | 1 | 0 | 0 | 0 | 0 | 0 | 1 |
| LHFPL1    | 0 | 1 | 0 | 0 | 0 | 0 | 0 | 1 |
| TOX       | 0 | 1 | 0 | 0 | 0 | 0 | 0 | 1 |
| MT1E      | 0 | 1 | 0 | 0 | 0 | 0 | 0 | 1 |
| ITPRIPL1  | 0 | 1 | 0 | 0 | 0 | 0 | 0 | 1 |
| SGCA      | 0 | 1 | 0 | 0 | 0 | 0 | 0 | 1 |
| MUSTN1    | 0 | 1 | 0 | 0 | 0 | 0 | 0 | 1 |
| CCDC141   | 0 | 1 | 0 | 0 | 0 | 0 | 0 | 1 |
| LOC389493 | 0 | 1 | 0 | 0 | 0 | 0 | 0 | 1 |
| AGAP2     | 0 | 1 | 0 | 0 | 0 | 0 | 0 | 1 |
| CMKLR1    | 0 | 1 | 0 | 0 | 0 | 0 | 0 | 1 |
| PBX4      | 0 | 1 | 0 | 0 | 0 | 0 | 0 | 1 |
| PRF1      | 0 | 1 | 0 | 0 | 0 | 0 | 0 | 1 |

|           |   |   |   |   |   |   |   |   |
|-----------|---|---|---|---|---|---|---|---|
| PAH       | 0 | 1 | 0 | 0 | 0 | 0 | 0 | 1 |
| SAMD3     | 0 | 1 | 0 | 0 | 0 | 0 | 0 | 1 |
| C12orf69  | 0 | 1 | 0 | 0 | 0 | 0 | 0 | 1 |
| NKG7      | 0 | 1 | 0 | 0 | 0 | 0 | 0 | 1 |
| FCN3      | 0 | 1 | 0 | 0 | 0 | 0 | 0 | 1 |
| RUNDC2A   | 0 | 0 | 0 | 1 | 0 | 0 | 0 | 1 |
| KLHL11    | 0 | 0 | 0 | 1 | 0 | 0 | 0 | 1 |
| FADS2     | 0 | 0 | 0 | 1 | 0 | 0 | 0 | 1 |
| LOC402377 | 0 | 0 | 0 | 1 | 0 | 0 | 0 | 1 |
| PLXNB3    | 0 | 0 | 0 | 0 | 1 | 0 | 0 | 1 |
| NDRG4     | 0 | 0 | 0 | 0 | 1 | 0 | 0 | 1 |
| ROR2      | 0 | 0 | 0 | 0 | 1 | 0 | 0 | 1 |
| DGKI      | 0 | 0 | 0 | 0 | 1 | 0 | 0 | 1 |
| MRGPRF    | 0 | 0 | 0 | 0 | 1 | 0 | 0 | 1 |
| IGF2BP3   | 0 | 0 | 0 | 0 | 1 | 0 | 0 | 1 |
| FOXF1     | 0 | 0 | 0 | 0 | 1 | 0 | 0 | 1 |
| WNT11     | 0 | 0 | 0 | 0 | 1 | 0 | 0 | 1 |
| CECR2     | 0 | 0 | 0 | 0 | 1 | 0 | 0 | 1 |
| PCDHB18   | 0 | 0 | 0 | 0 | 1 | 0 | 0 | 1 |
| OSR1      | 0 | 0 | 0 | 0 | 1 | 0 | 0 | 1 |
| ADAM33    | 0 | 0 | 0 | 0 | 1 | 0 | 0 | 1 |
| NLGN3     | 0 | 0 | 0 | 0 | 1 | 0 | 0 | 1 |
| RPS6KL1   | 0 | 0 | 0 | 0 | 1 | 0 | 0 | 1 |
| GPR20     | 0 | 0 | 0 | 0 | 1 | 0 | 0 | 1 |
| PSAT1     | 0 | 0 | 0 | 0 | 1 | 0 | 0 | 1 |
| CILP      | 0 | 0 | 0 | 0 | 1 | 0 | 0 | 1 |
| COPZ2     | 0 | 0 | 0 | 0 | 1 | 0 | 0 | 1 |
| TLL1      | 0 | 0 | 0 | 0 | 1 | 0 | 0 | 1 |
| C9orf43   | 0 | 0 | 0 | 0 | 1 | 0 | 0 | 1 |
| TMEM63C   | 0 | 0 | 0 | 0 | 1 | 0 | 0 | 1 |

|          |   |   |   |   |   |   |   |   |
|----------|---|---|---|---|---|---|---|---|
| CHRNA3   | 0 | 0 | 0 | 0 | 1 | 0 | 0 | 1 |
| CD300C   | 0 | 0 | 0 | 0 | 1 | 0 | 0 | 1 |
| STEAP2   | 0 | 0 | 0 | 0 | 1 | 0 | 0 | 1 |
| CCDC85A  | 0 | 0 | 0 | 0 | 1 | 0 | 0 | 1 |
| CACNA1H  | 0 | 0 | 0 | 0 | 1 | 0 | 0 | 1 |
| BCL2L15  | 0 | 0 | 0 | 0 | 1 | 0 | 0 | 1 |
| ZFPM2    | 0 | 0 | 0 | 0 | 1 | 0 | 0 | 1 |
| ADM2     | 0 | 0 | 0 | 0 | 1 | 0 | 0 | 1 |
| ADAMTS5  | 0 | 0 | 0 | 0 | 1 | 0 | 0 | 1 |
| FXVD1    | 0 | 0 | 0 | 0 | 1 | 0 | 0 | 1 |
| PDE10A   | 0 | 0 | 0 | 0 | 1 | 0 | 0 | 1 |
| MGAT5B   | 0 | 0 | 0 | 0 | 1 | 0 | 0 | 1 |
| SMTNL2   | 0 | 0 | 0 | 0 | 1 | 0 | 0 | 1 |
| OLFML1   | 0 | 0 | 0 | 0 | 1 | 0 | 0 | 1 |
| RASSF6   | 0 | 0 | 0 | 0 | 1 | 0 | 0 | 1 |
| PGF      | 0 | 0 | 0 | 0 | 1 | 0 | 0 | 1 |
| PPARGC1A | 0 | 0 | 0 | 0 | 1 | 0 | 0 | 1 |
| KLHL4    | 0 | 0 | 0 | 0 | 1 | 0 | 0 | 1 |
| PGM5P2   | 0 | 0 | 0 | 0 | 1 | 0 | 0 | 1 |
| FHL2     | 0 | 0 | 0 | 0 | 1 | 0 | 0 | 1 |
| WFIKKN1  | 0 | 0 | 0 | 0 | 1 | 0 | 0 | 1 |
| FABP5    | 0 | 0 | 0 | 0 | 1 | 0 | 0 | 1 |
| C4orf31  | 0 | 0 | 0 | 0 | 1 | 0 | 0 | 1 |
| EPHB1    | 0 | 0 | 0 | 0 | 1 | 0 | 0 | 1 |
| RBM24    | 0 | 0 | 0 | 0 | 1 | 0 | 0 | 1 |
| GRAMD2   | 0 | 0 | 0 | 0 | 1 | 0 | 0 | 1 |
| AKAP12   | 0 | 0 | 0 | 0 | 1 | 0 | 0 | 1 |
| SIGLEC11 | 0 | 0 | 0 | 0 | 1 | 0 | 0 | 1 |
| PDPN     | 0 | 0 | 0 | 0 | 1 | 0 | 0 | 1 |
| ITIH3    | 0 | 0 | 0 | 0 | 1 | 0 | 0 | 1 |

|           |   |   |   |   |   |   |   |   |
|-----------|---|---|---|---|---|---|---|---|
| PLA2G4F   | 0 | 0 | 0 | 0 | 1 | 0 | 0 | 1 |
| LRRN4CL   | 0 | 0 | 0 | 0 | 1 | 0 | 0 | 1 |
| ISM1      | 0 | 0 | 0 | 0 | 1 | 0 | 0 | 1 |
| C12orf68  | 0 | 0 | 0 | 0 | 1 | 0 | 0 | 1 |
| STK32B    | 0 | 0 | 0 | 0 | 1 | 0 | 0 | 1 |
| HGF       | 0 | 0 | 0 | 0 | 1 | 0 | 0 | 1 |
| MYOM3     | 0 | 0 | 0 | 0 | 1 | 0 | 0 | 1 |
| PCSK1     | 0 | 0 | 0 | 0 | 1 | 0 | 0 | 1 |
| MGC42105  | 0 | 0 | 0 | 0 | 1 | 0 | 0 | 1 |
| VIP       | 0 | 0 | 0 | 0 | 0 | 1 | 0 | 1 |
| C18orf16  | 0 | 0 | 0 | 0 | 0 | 1 | 0 | 1 |
| EFHB      | 0 | 0 | 0 | 0 | 0 | 1 | 0 | 1 |
| C20orf203 | 0 | 0 | 0 | 0 | 0 | 1 | 0 | 1 |
| PACSIN1   | 0 | 0 | 0 | 0 | 0 | 0 | 1 | 1 |
| GPR34     | 0 | 0 | 0 | 0 | 0 | 0 | 1 | 1 |
| TNFSF8    | 0 | 0 | 0 | 0 | 0 | 0 | 1 | 1 |

\*IMRT: Treated with Intensity Modulated Radiation Therapy

\*\*Patient displayed persistent loco-regional or distant disease

\*\*\*Patient had tumor at follow-up

\*\*\*\*New tumor event after initial pathological diagnosis

\*\*\*\*\*Number of left-out groups for which gene remained significantly differentially regulated

**Supplementary table 5. Genes downregulated in poor-prognosis PTC & overlapping with published (referenced) gene-sets**

| Gene     | Reyes_markers (ref #23) | Dely_markers (ref 20) | Griffith_markers (ref #18) | TSgene_Tumor_Suppressor_Genes (ref #16) |
|----------|-------------------------|-----------------------|----------------------------|-----------------------------------------|
| ACE      | ACE                     |                       | NA                         | NA                                      |
| AOX1     | AOX1                    | AOX1                  | NA                         | NA                                      |
| ATP2C2   | ATP2C2                  |                       | NA                         | NA                                      |
| AXIN2    | NA                      | NA                    | NA                         | AXIN2                                   |
| CCL21    |                         | CCL21                 | NA                         | NA                                      |
| CDH16    | CDH16                   | CDH16                 | NA                         | NA                                      |
| CXCL12   |                         | CXCL12                | NA                         | NA                                      |
| DIO1     |                         | DIO1                  | DIO1                       | NA                                      |
| DLG2     |                         | DLG2                  | NA                         | NA                                      |
| DPP6     | DPP6                    | DPP6                  | NA                         | NA                                      |
| FLRT1    | FLRT1                   |                       | NA                         | NA                                      |
| GABRB3   | GABRB3                  |                       | NA                         | NA                                      |
| GDF10    |                         | GDF10                 | NA                         | NA                                      |
| GFRA1    | GFRA1                   |                       | NA                         | NA                                      |
| GNA14    | GNA14                   | GNA14                 | NA                         | NA                                      |
| GPMB     | GPMB                    |                       | NA                         | NA                                      |
| HGD      | HGD                     | HGD                   | NA                         | NA                                      |
| IGFBPL1  | IGFBPL1                 |                       | NA                         | IGFBPL1                                 |
| IQGAP2   |                         | IQGAP2                | NA                         | IQGAP2                                  |
| IRS1     |                         | IRS1                  | NA                         | NA                                      |
| ITPR1    | ITPR1                   | ITPR1                 | ITPR1                      | NA                                      |
| KIAA1324 | KIAA1324                |                       | NA                         | NA                                      |
| KIT      |                         | KIT                   | NA                         | NA                                      |
| LIFR     | LIFR                    | LIFR                  | NA                         | LIFR                                    |
| LTF      |                         | LTF                   | NA                         | LTF                                     |
| MPPED2   |                         | MPPED2                | NA                         | NA                                      |
| PLA2R1   | PLA2R1                  | PLA2R1                | NA                         | NA                                      |
| RASL11A  | NA                      | NA                    | NA                         | RASL11A                                 |
| RASSF9   | RASSF9                  | RASSF9                | NA                         | NA                                      |
| RELN     |                         | RELN                  | NA                         | NA                                      |
| RERGL    |                         | RERGL                 | NA                         | NA                                      |
| RYR2     | RYR2                    | RYR2                  | NA                         | NA                                      |
| SEMA3D   |                         | SEMA3D                | NA                         | NA                                      |
| SLC4A4   | SLC4A4                  | SLC4A4                | NA                         | NA                                      |
| SLC5A8   | NA                      | NA                    | NA                         | SLC5A8                                  |
| SORBS2   |                         | SORBS2                | NA                         | NA                                      |
| SYNE1    |                         | SYNE1                 | NA                         | NA                                      |
| SYNM     |                         | SYNM                  | NA                         | SYNM                                    |
| TFCP2C1  | TFCP2C1                 |                       | NA                         | NA                                      |
| TFF3     | NA                      | NA                    | TFF3                       | NA                                      |
| WSCD2    | WSCD2                   |                       | NA                         | NA                                      |
| ZNF366   | NA                      | NA                    | NA                         | ZNF366                                  |

**Supplementary Table 6: Distribution of clinicopathological and demographic factors in intermediate risk patients classified as good or poor prognosis by PAM model (All samples)**

| <b>Factor</b>                  | <b>Level</b>                  | <b>Poor Prognosis (n)</b> | <b>Good Prognosis (n)</b> | <b>P-value* (difference between prognostic groups)</b> |
|--------------------------------|-------------------------------|---------------------------|---------------------------|--------------------------------------------------------|
| <u>Extra-thyroid extension</u> | None                          | 97                        | 111                       | 0.001                                                  |
|                                | Minimal                       | 46                        | 19                        |                                                        |
|                                | Moderate/Advanced             | 1                         | 0                         |                                                        |
| <u>Nodal involvement</u>       | Absent                        | 63                        | 74                        | <0.0001                                                |
|                                | Present                       | 94                        | 40                        |                                                        |
| <u>Clinical stage</u>          | Stage 1                       | 40                        | 30                        | 0.1                                                    |
|                                | Stage 2                       | 72                        | 70                        |                                                        |
|                                | Stage 3                       | 64                        | 35                        |                                                        |
| <u>Mutations</u>               | BRAF                          | 165                       | 26                        | <0.0001                                                |
|                                | HRAS                          | 0                         | 11                        | <0.0001                                                |
|                                | KRAS                          | 1                         | 2                         | 0.67                                                   |
|                                | NRAS                          | 6                         | 19                        | <0.0001                                                |
| <u>Histological subtype</u>    | Classical                     | 177                       | 77                        | <0.0001                                                |
|                                | Follicular                    | 16                        | 62                        |                                                        |
|                                | Tall Cell                     | 28                        | 3                         |                                                        |
| <u>Age at diagnosis</u>        | (Mean (Inter-quartile range)) | 45.4 (33-56)              | 47.66 (34.5-60)           | 0.17                                                   |

|               |               |     |     |      |
|---------------|---------------|-----|-----|------|
| <u>Gender</u> | Female        | 163 | 108 | 0.51 |
|               | Male          | 64  | 35  |      |
| <u>Race</u>   | Asian         | 22  | 13  | 0.55 |
|               | Black/African | 11  | 3   |      |
|               | White         | 158 | 71  |      |

\*(Pearson chi-squared (categorical variables), or Student's T-test (continuous variables))

**Supplementary table 7: Distribution of clinical characteristics of intermediate good and intermediate poor prognosis groups in leave-one-out cross validation**

| Left-out-group        | Intermediate good prognosis                  |            | Intermediate poor prognosis |            |
|-----------------------|----------------------------------------------|------------|-----------------------------|------------|
|                       | Number                                       | Percentage | Number                      | Percentage |
| Adjuvant drug therapy | 6                                            | 0.38       | 10                          | 0.63       |
| IMRT*                 | 1                                            | 0.5        | 1                           | 0.5        |
| Persistent disease**  | 3                                            | 0.27       | 8                           | 0.73       |
| With tumor***         | 18                                           | 0.43       | 24                          | 0.57       |
| Died of PTC           | 5                                            | 0.36       | 9                           | 0.64       |
| Metastases present    | 1                                            | 0.11       | 8                           | 0.89       |
| New tumor event****   | 2                                            | 0.2        | 8                           | 0.8        |
|                       | <b>Mutation (percentage of samples with)</b> |            |                             |            |
|                       | BRAF                                         | RASx*      | BRAF                        | RASx*      |
| Adjuvant drug therapy | 0.1                                          | 0.09       | 0.36                        | 0.01       |
| IMRT                  | 0.06                                         | 0.08       | 0.37                        | 0.01       |
| Persistent disease    | 0.08                                         | 0.08       | 0.36                        | 0.01       |
| With tumor            | 0.19                                         | 0.09       | 0.33                        | 0.01       |
| Died of PTC           | 0.08                                         | 0.08       | 0.36                        | 0.01       |
| Metastases present    | 0.06                                         | 0.09       | 0.36                        | 0.01       |
| New tumor event       | 0.07                                         | 0.08       | 0.36                        | 0.01       |
|                       | <b>Nodal involvement (n)</b>                 |            |                             |            |
|                       | Without                                      | With       | Without                     | With       |
| Adjuvant drug therapy | 93                                           | 46         | 44                          | 83         |
| IMRT                  | 73                                           | 37         | 44                          | 83         |
| Persistent disease    | 77                                           | 43         | 44                          | 83         |
| With tumor            | 99                                           | 72         | 44                          | 83         |



|                    |    |    |    |    |
|--------------------|----|----|----|----|
| Died of PTC        | 77 | 43 | 44 | 83 |
| Metastases present | 78 | 41 | 44 | 83 |
| New tumor event    | 74 | 40 | 44 | 83 |

**Stage (n)**

|                       | Stage 1 | Stage 2 | Stage 3 | Stage 1 | Stage 2 | Stage 3 |
|-----------------------|---------|---------|---------|---------|---------|---------|
| Adjuvant drug therapy | 38      | 80      | 44      | 32      | 58      | 54      |
| IMRT                  | 29      | 67      | 35      | 32      | 58      | 54      |
| Persistent disease    | 36      | 69      | 37      | 32      | 58      | 54      |
| With tumor            | 51      | 88      | 58      | 32      | 58      | 54      |
| Died of PTC           | 35      | 71      | 36      | 32      | 58      | 54      |
| Metastases present    | 32      | 71      | 37      | 32      | 58      | 54      |
| New tumor event       | 30      | 70      | 35      | 32      | 58      | 54      |

**Histological subtype (n)**

|                       | Unknown | Classical | Follicular | Tall Cell | Unknown | Classical | Follicular | Tall Cell |
|-----------------------|---------|-----------|------------|-----------|---------|-----------|------------|-----------|
| Adjuvant drug therapy | 2       | 96        | 68         | 1         | 5       | 144       | 9          | 26        |
| IMRT                  | 1       | 72        | 61         | 3         | 5       | 144       | 9          | 26        |
| Persistent disease    | 3       | 80        | 64         | 3         | 5       | 144       | 9          | 26        |
| With tumor            | 4       | 142       | 66         | 8         | 5       | 144       | 9          | 26        |
| Died of PTC           | 2       | 85        | 64         | 4         | 5       | 144       | 9          | 26        |
| Metastases present    | 2       | 78        | 65         | 2         | 5       | 144       | 9          | 26        |
| New tumor event       | 1       | 77        | 62         | 3         | 5       | 144       | 9          | 26        |

\*IMRT: Treated with Intensity Modulated Radiation Therapy

\*\*Patient displayed persistent loco-regional or distant disease

\*\*\*Patient had tumor at follow-up

\*\*\*\*New tumor event after initial pathological diagnosis

\*\*\*\*\*Number of left-out groups for which gene remained significantly differentially regulated

\*\*\*\*\* KRAS or HRAS mutations

**Supplementary table 8: Genes used within the PAM classifier, and presence (1) or absence (0) of each gene within classifier, when patients representing each of 6 poor prognostic factors are left out**

| Genes      | Left out group (patients associated with specified poor prognostic clinical factor) |        |                      |               |             |                    |                     | Sum***** |
|------------|-------------------------------------------------------------------------------------|--------|----------------------|---------------|-------------|--------------------|---------------------|----------|
|            | Adjuvant drug therapy                                                               | IMRT** | Persistent disease** | With tumor*** | Died of PTC | Metastases present | New tumor event**** |          |
| WSCD2      | 1                                                                                   | 1      | 1                    | 1             | 1           | 1                  | 1                   | 7        |
| MRO        | 1                                                                                   | 1      | 1                    | 1             | 1           | 1                  | 1                   | 7        |
| TDGF1      | 1                                                                                   | 1      | 1                    | 1             | 1           | 1                  | 1                   | 7        |
| LTF        | 1                                                                                   | 1      | 1                    | 1             | 1           | 1                  | 1                   | 7        |
| LIMS3      | 1                                                                                   | 1      | 1                    | 1             | 1           | 1                  | 1                   | 7        |
| FAM65C     | 1                                                                                   | 1      | 1                    | 1             | 1           | 1                  | 1                   | 7        |
| SOD3       | 1                                                                                   | 1      | 1                    | 1             | 1           | 1                  | 1                   | 7        |
| GRIP2      | 1                                                                                   | 1      | 1                    | 1             | 1           | 1                  | 1                   | 7        |
| RUNX1T1    | 1                                                                                   | 1      | 1                    | 1             | 1           | 1                  | 1                   | 7        |
| CELF4      | 1                                                                                   | 1      | 1                    | 1             | 1           | 1                  | 1                   | 7        |
| PCSK6      | 1                                                                                   | 1      | 1                    | 1             | 1           | 1                  | 1                   | 7        |
| ABCB1      | 1                                                                                   | 1      | 1                    | 1             | 1           | 1                  | 1                   | 7        |
| SYT15      | 1                                                                                   | 1      | 1                    | 1             | 1           | 1                  | 1                   | 7        |
| NR1D1      | 1                                                                                   | 1      | 1                    | 1             | 1           | 1                  | 1                   | 7        |
| PEAR1      | 1                                                                                   | 1      | 1                    | 1             | 1           | 1                  | 1                   | 7        |
| MAP2K6     | 1                                                                                   | 1      | 1                    | 1             | 1           | 1                  | 1                   | 7        |
| RCAN2      | 1                                                                                   | 1      | 1                    | 1             | 1           | 1                  | 1                   | 7        |
| FAM124B    | 1                                                                                   | 1      | 1                    | 1             | 1           | 1                  | 1                   | 7        |
| GRIN2C     | 1                                                                                   | 1      | 1                    | 0             | 1           | 1                  | 1                   | 6        |
| TFF3       | 1                                                                                   | 1      | 1                    | 0             | 1           | 1                  | 1                   | 6        |
| SPINK5     | 1                                                                                   | 1      | 1                    | 0             | 1           | 1                  | 1                   | 6        |
| KCNJ13     | 1                                                                                   | 1      | 1                    | 0             | 1           | 1                  | 1                   | 6        |
| MPPED2     | 1                                                                                   | 1      | 1                    | 0             | 1           | 1                  | 1                   | 6        |
| FLRT1      | 1                                                                                   | 1      | 1                    | 0             | 1           | 1                  | 1                   | 6        |
| OC10013023 | 1                                                                                   | 1      | 1                    | 0             | 1           | 1                  | 1                   | 6        |
| KIF19      | 1                                                                                   | 1      | 1                    | 0             | 1           | 1                  | 1                   | 6        |
| GABRB3     | 1                                                                                   | 1      | 1                    | 0             | 1           | 1                  | 1                   | 6        |
| RERGL      | 1                                                                                   | 1      | 1                    | 1             | 0           | 1                  | 1                   | 6        |
| CD300LG    | 1                                                                                   | 1      | 1                    | 1             | 1           | 0                  | 1                   | 6        |
| IGDCC3     | 1                                                                                   | 1      | 1                    | 0             | 1           | 1                  | 1                   | 6        |
| GCK        | 1                                                                                   | 1      | 1                    | 0             | 1           | 1                  | 1                   | 6        |
| IQGAP2     | 1                                                                                   | 1      | 1                    | 0             | 1           | 1                  | 1                   | 6        |
| AQP7       | 1                                                                                   | 1      | 1                    | 0             | 1           | 1                  | 1                   | 6        |
| GNA14      | 1                                                                                   | 1      | 1                    | 0             | 1           | 1                  | 1                   | 6        |
| SLC10A4    | 1                                                                                   | 1      | 1                    | 0             | 1           | 1                  | 1                   | 6        |
| CLCNKB     | 1                                                                                   | 1      | 1                    | 0             | 1           | 1                  | 1                   | 6        |
| FZD9       | 1                                                                                   | 1      | 1                    | 0             | 1           | 1                  | 1                   | 6        |
| REEP1      | 1                                                                                   | 1      | 1                    | 0             | 1           | 1                  | 1                   | 6        |
| CGNL1      | 1                                                                                   | 1      | 1                    | 0             | 1           | 1                  | 1                   | 6        |
| LRRC4B     | 1                                                                                   | 1      | 1                    | 0             | 1           | 1                  | 1                   | 6        |
| FSTL3      | 1                                                                                   | 1      | 1                    | 0             | 1           | 1                  | 1                   | 6        |
| PGM5       | 1                                                                                   | 1      | 1                    | 0             | 1           | 1                  | 1                   | 6        |
| LOC145820  | 1                                                                                   | 1      | 1                    | 0             | 1           | 1                  | 1                   | 6        |
| PTPRR      | 1                                                                                   | 1      | 1                    | 0             | 1           | 1                  | 1                   | 6        |
| SNX22      | 1                                                                                   | 1      | 1                    | 0             | 1           | 1                  | 1                   | 6        |
| EBF3       | 1                                                                                   | 1      | 1                    | 0             | 1           | 1                  | 1                   | 6        |
| PAMR1      | 1                                                                                   | 1      | 1                    | 0             | 1           | 1                  | 1                   | 6        |
| SYNM       | 1                                                                                   | 1      | 1                    | 0             | 1           | 1                  | 1                   | 6        |
| SYNGR1     | 1                                                                                   | 1      | 1                    | 0             | 1           | 1                  | 1                   | 6        |
| TM4SF18    | 1                                                                                   | 1      | 1                    | 0             | 1           | 1                  | 1                   | 6        |
| LRRC4      | 1                                                                                   | 1      | 1                    | 0             | 1           | 1                  | 1                   | 6        |
| EMCN       | 1                                                                                   | 1      | 1                    | 0             | 1           | 1                  | 1                   | 6        |
| NOSTRIN    | 1                                                                                   | 1      | 1                    | 0             | 1           | 1                  | 1                   | 6        |
| CCL21      | 0                                                                                   | 1      | 1                    | 1             | 1           | 1                  | 1                   | 6        |
| CDH16      | 0                                                                                   | 1      | 1                    | 1             | 1           | 1                  | 1                   | 6        |
| PLA2R1     | 0                                                                                   | 1      | 1                    | 1             | 1           | 1                  | 1                   | 6        |
| NOX5       | 1                                                                                   | 1      | 1                    | 0             | 0           | 1                  | 1                   | 5        |
| GRIK4      | 1                                                                                   | 1      | 0                    | 0             | 1           | 1                  | 1                   | 5        |
| AREG       | 1                                                                                   | 1      | 1                    | 0             | 0           | 1                  | 1                   | 5        |
| VIPR1      | 1                                                                                   | 1      | 1                    | 0             | 0           | 1                  | 1                   | 5        |
| KY         | 1                                                                                   | 1      | 1                    | 0             | 0           | 1                  | 1                   | 5        |
| SLC14A1    | 1                                                                                   | 1      | 1                    | 0             | 0           | 1                  | 1                   | 5        |
| C1QTNF9B   | 1                                                                                   | 1      | 1                    | 0             | 0           | 1                  | 1                   | 5        |
| SDK2       | 1                                                                                   | 1      | 0                    | 1             | 1           | 1                  | 0                   | 5        |
| IQGAP3     | 1                                                                                   | 1      | 1                    | 0             | 0           | 1                  | 1                   | 5        |
| SORBS2     | 1                                                                                   | 1      | 0                    | 0             | 1           | 1                  | 1                   | 5        |
| SHISA2     | 1                                                                                   | 1      | 1                    | 0             | 0           | 1                  | 1                   | 5        |
| RASL11A    | 1                                                                                   | 1      | 1                    | 0             | 0           | 1                  | 1                   | 5        |

|            |   |   |   |   |   |   |   |   |
|------------|---|---|---|---|---|---|---|---|
| SAMD5      | 0 | 1 | 1 | 1 | 1 | 1 | 0 | 5 |
| SYNE1      | 0 | 1 | 1 | 0 | 1 | 1 | 1 | 5 |
| CLCNKA     | 1 | 0 | 0 | 0 | 1 | 1 | 1 | 4 |
| EPHA10     | 1 | 0 | 1 | 0 | 0 | 1 | 1 | 4 |
| COLEC11    | 1 | 1 | 1 | 0 | 0 | 1 | 0 | 4 |
| C3orf32    | 1 | 1 | 1 | 0 | 0 | 0 | 1 | 4 |
| C8orf80    | 0 | 1 | 1 | 1 | 0 | 0 | 1 | 4 |
| NWD1       | 0 | 1 | 1 | 0 | 1 | 1 | 0 | 4 |
| KIAA1324   | 0 | 1 | 1 | 0 | 0 | 1 | 1 | 4 |
| DLG2       | 0 | 1 | 1 | 1 | 1 | 0 | 0 | 4 |
| FCGBP      | 0 | 1 | 1 | 0 | 1 | 1 | 0 | 4 |
| MYRIP      | 0 | 1 | 1 | 0 | 1 | 0 | 1 | 4 |
| AXIN2      | 0 | 1 | 0 | 1 | 0 | 1 | 1 | 4 |
| AGTR1      | 1 | 1 | 1 | 0 | 0 | 0 | 0 | 3 |
| CCL14      | 1 | 0 | 1 | 0 | 1 | 0 | 0 | 3 |
| ANO2       | 1 | 0 | 1 | 0 | 0 | 0 | 1 | 3 |
| ALDH1A1    | 1 | 0 | 0 | 0 | 0 | 1 | 1 | 3 |
| GDF10      | 0 | 0 | 1 | 1 | 1 | 0 | 0 | 3 |
| FAM163A    | 0 | 0 | 1 | 1 | 1 | 0 | 0 | 3 |
| GVIN1      | 0 | 0 | 1 | 1 | 0 | 0 | 1 | 3 |
| DUSP26     | 0 | 0 | 0 | 1 | 0 | 1 | 1 | 3 |
| ADCY5      | 0 | 0 | 0 | 1 | 1 | 1 | 0 | 3 |
| IRS1       | 0 | 0 | 0 | 0 | 1 | 1 | 1 | 3 |
| KCNAB1     | 1 | 0 | 0 | 0 | 0 | 1 | 0 | 2 |
| HIST1H1D   | 1 | 0 | 1 | 0 | 0 | 0 | 0 | 2 |
| ST3GAL6    | 1 | 0 | 0 | 0 | 0 | 1 | 0 | 2 |
| TRPC6      | 1 | 0 | 0 | 0 | 0 | 1 | 0 | 2 |
| ACE        | 1 | 0 | 0 | 0 | 1 | 0 | 0 | 2 |
| B3GNT4     | 1 | 0 | 1 | 0 | 0 | 0 | 0 | 2 |
| LOC90246   | 1 | 0 | 0 | 0 | 1 | 0 | 0 | 2 |
| FAM124A    | 0 | 1 | 0 | 0 | 1 | 0 | 0 | 2 |
| RAG1       | 0 | 1 | 0 | 0 | 1 | 0 | 0 | 2 |
| SLC5A8     | 0 | 0 | 1 | 1 | 0 | 0 | 0 | 2 |
| LOC286002  | 0 | 0 | 1 | 0 | 0 | 1 | 0 | 2 |
| CLEC4E     | 0 | 0 | 1 | 0 | 0 | 0 | 1 | 2 |
| TFCP2L1    | 0 | 0 | 1 | 0 | 1 | 0 | 0 | 2 |
| CNTN2      | 0 | 0 | 1 | 0 | 0 | 1 | 0 | 2 |
| UCN        | 0 | 0 | 1 | 1 | 0 | 0 | 0 | 2 |
| AOX1       | 0 | 0 | 0 | 1 | 1 | 0 | 0 | 2 |
| LRRTM1     | 0 | 0 | 0 | 0 | 1 | 1 | 0 | 2 |
| FHL1       | 0 | 0 | 0 | 0 | 1 | 1 | 0 | 2 |
| RADIL      | 0 | 0 | 0 | 0 | 1 | 1 | 0 | 2 |
| ESRRG      | 0 | 0 | 0 | 0 | 1 | 1 | 0 | 2 |
| FLJ23867   | 0 | 0 | 0 | 0 | 0 | 1 | 1 | 2 |
| CA4        | 1 | 0 | 0 | 0 | 0 | 0 | 0 | 1 |
| LOX        | 1 | 0 | 0 | 0 | 0 | 0 | 0 | 1 |
| QRFPR      | 1 | 0 | 0 | 0 | 0 | 0 | 0 | 1 |
| CETP       | 1 | 0 | 0 | 0 | 0 | 0 | 0 | 1 |
| DNASE1L3   | 1 | 0 | 0 | 0 | 0 | 0 | 0 | 1 |
| EXOC3L2    | 1 | 0 | 0 | 0 | 0 | 0 | 0 | 1 |
| TMEM88     | 1 | 0 | 0 | 0 | 0 | 0 | 0 | 1 |
| REM1       | 1 | 0 | 0 | 0 | 0 | 0 | 0 | 1 |
| RTN4RL1    | 1 | 0 | 0 | 0 | 0 | 0 | 0 | 1 |
| KDR        | 1 | 0 | 0 | 0 | 0 | 0 | 0 | 1 |
| HSN2       | 1 | 0 | 0 | 0 | 0 | 0 | 0 | 1 |
| CLEC3B     | 1 | 0 | 0 | 0 | 0 | 0 | 0 | 1 |
| FLT4       | 1 | 0 | 0 | 0 | 0 | 0 | 0 | 1 |
| ROBO4      | 1 | 0 | 0 | 0 | 0 | 0 | 0 | 1 |
| HIST1H1E   | 0 | 0 | 1 | 0 | 0 | 0 | 0 | 1 |
| ANGPT1     | 0 | 0 | 1 | 0 | 0 | 0 | 0 | 1 |
| KCNH1      | 0 | 0 | 1 | 0 | 0 | 0 | 0 | 1 |
| VWF        | 0 | 0 | 1 | 0 | 0 | 0 | 0 | 1 |
| GFRA1      | 0 | 0 | 0 | 1 | 0 | 0 | 0 | 1 |
| ECEL1      | 0 | 0 | 0 | 1 | 0 | 0 | 0 | 1 |
| ITGA8      | 0 | 0 | 0 | 1 | 0 | 0 | 0 | 1 |
| HAP1       | 0 | 0 | 0 | 1 | 0 | 0 | 0 | 1 |
| OC10030265 | 0 | 0 | 0 | 1 | 0 | 0 | 0 | 1 |
| CXCL12     | 0 | 0 | 0 | 1 | 0 | 0 | 0 | 1 |
| ZNF366     | 0 | 0 | 0 | 1 | 0 | 0 | 0 | 1 |
| COCH       | 0 | 0 | 0 | 1 | 0 | 0 | 0 | 1 |
| OC10013486 | 0 | 0 | 0 | 1 | 0 | 0 | 0 | 1 |
| LOC442421  | 0 | 0 | 0 | 1 | 0 | 0 | 0 | 1 |
| CDYL2      | 0 | 0 | 0 | 1 | 0 | 0 | 0 | 1 |

|          |   |   |   |   |   |   |   |   |
|----------|---|---|---|---|---|---|---|---|
| PKHD1L1  | 0 | 0 | 0 | 0 | 1 | 0 | 0 | 1 |
| ZMAT4    | 0 | 0 | 0 | 0 | 1 | 0 | 0 | 1 |
| SEMA3D   | 0 | 0 | 0 | 0 | 1 | 0 | 0 | 1 |
| PI16     | 0 | 0 | 0 | 0 | 1 | 0 | 0 | 1 |
| RELN     | 0 | 0 | 0 | 0 | 1 | 0 | 0 | 1 |
| IGFBPL1  | 0 | 0 | 0 | 0 | 1 | 0 | 0 | 1 |
| RYR2     | 0 | 0 | 0 | 0 | 1 | 0 | 0 | 1 |
| KLK10    | 0 | 0 | 0 | 0 | 1 | 0 | 0 | 1 |
| ATP2C2   | 0 | 0 | 0 | 0 | 1 | 0 | 0 | 1 |
| DIRAS2   | 0 | 0 | 0 | 0 | 1 | 0 | 0 | 1 |
| RASSF9   | 0 | 0 | 0 | 0 | 1 | 0 | 0 | 1 |
| PAPSS2   | 0 | 0 | 0 | 0 | 1 | 0 | 0 | 1 |
| MT1G     | 0 | 0 | 0 | 0 | 0 | 1 | 0 | 1 |
| FAM189A1 | 0 | 0 | 0 | 0 | 0 | 1 | 0 | 1 |
| APBA2    | 0 | 0 | 0 | 0 | 0 | 1 | 0 | 1 |
| LEMD1    | 0 | 0 | 0 | 0 | 0 | 1 | 0 | 1 |
| CACNB4   | 0 | 0 | 0 | 0 | 0 | 1 | 0 | 1 |
| RSPH4A   | 0 | 0 | 0 | 0 | 0 | 1 | 0 | 1 |
| PTCH2    | 0 | 0 | 0 | 0 | 0 | 1 | 0 | 1 |
| NFASC    | 0 | 0 | 0 | 0 | 0 | 1 | 0 | 1 |
| GLDC     | 0 | 0 | 0 | 0 | 0 | 0 | 1 | 1 |
| SIDT1    | 0 | 0 | 0 | 0 | 0 | 0 | 1 | 1 |
| C1orf51  | 0 | 0 | 0 | 0 | 0 | 0 | 1 | 1 |

ensity Modulated Radiation Therapy

istent loco-regional or distant disease

: had tumor at follow-up

t after initial pathological diagnosis

:h gene remained significantly differentially regulated
